# 1 **Agro-morphological and phenotypic variability of sweet basil** 2 **(*Ocimum basilicum* L.) genotypes for breeding purposes**

3 **Gulsum Yaldiz<sup>1\*</sup>, Mahmut Camlica<sup>1</sup>**

4 **1 Bolu Abant İzzet Baysal University, Agricultural and Natural Sciences Faculty, Department**  
5 **of Field Crops, 14280, Bolu, Turkey**

6 **\*g\_yaldiz@hotmail.com**

## 7 **Abstract**

8 The genus *Ocimum* is very complicated due to the presence of huge morphological variability  
9 along with genetic diversity. Basil (*Ocimum basilicum* L.) has pharmacological properties like  
10 headaches, coughs, diarrhea, constipation, warts, worms, kidney malfunction, and its potential  
11 as a therapeutic agent in treating various age-related diseases. The present investigation  
12 comprised of sixty-one genotypes of basil was undertaken to characterize the genotypes based  
13 on morphological and phenological features, herbs and essential oil yield of genotypes. A wide  
14 range of variations for traits like days to first cutting (56.92-101.6), plant height (13.67-71.90  
15 cm), branch number (3.28-19.43 number/plant), fresh herb yields (12.94-274.11 g/plant), and  
16 essential oil yield (0.04-1.71%) were observed and can be useful for breeding purposes. PI  
17 652070 and PI 296391 genotypes were found superior in case of the highest herbs yield as  
18 compared with other genotypes. Overall, in PI 358469 and Ames 32309 genotypes exhibited  
19 the highest essential oil content. The constellation analysis was conducted to investigate the  
20 genetic diversity of basil genotypes. According to the constellation plot analysis, leaf shape and  
21 color were evaluated in 2017 and most of the basil genotypes located in the same main group.  
22 In 2018, moonlight and dino cultivars located in the same cluster 1 (C1) with PI 141198  
23 (US/Maryland) genotype and Georgia genotypes located in the same main group and they also

24 took place in the sub-main group except Ames 32314 genotype depending on UPOV criteria.

25 Each two years, Bolu genotype and midnight were found in the same main group.

26 **Keywords:** Basil genotypes; morphology; yield; genetic diversity

## 27 **1. Introduction**

28 The genus *Ocimum* comprises more than 150 species that were reported throughout the world,  
29 but commercially important basil cultivars mostly belong to the species *O. basilicum*. Sweet  
30 basil (*Ocimum basilicum* L.  $x=n = 12$ ) is an important essential oil crop in the Labiatae family,  
31 is an annual plant and is widely used as in food, pharmaceuticals, and cosmetics [1]. Also, the  
32 essential oil of obtained from its aerial parts contain linalool, eugenol, methyl chavicol, methyl  
33 cinnamate, ferulate, methyl eugenol, triterpenoids, and steroidal glycosides, which has high  
34 economic value because it contains important components, such as eugenol, chavicol, and their  
35 derivatives [2-4]. Traditionally, basil has been used as a medicinal plant in the treatment of  
36 headaches, coughs, diarrhea, constipation, warts, worms, kidney malfunction [5], to cure  
37 malarial fever [6,7], as well as against mosquito vectors and plasmodium parasites [8,9].

38 Basil genotypes have a wide variety of properties such as leaf sizes, color (green to dark  
39 purple), flower color (white, red, lavender and purple), growth characteristics (shape, height  
40 and flowering time) and aroma [10]. Therefore, the standard identifier list (UPOV 2003) has  
41 been used in the Guide for Conducting the Differences, Uniformity and Stability Tests (UPOV  
42 2003; available) by the International Association for the Protection of New Plant Varieties  
43 (UPOV) to identify the varieties correctly. The UPOV system of plant variety protection based  
44 on an individual test guidelines represent an agreed and harmonized approach for the  
45 examination of new cultivars of a species of interest. Several studies deal with grouping of basil  
46 varieties based on only one nutritional characteristics according to chemotype [11,12], phenolic  
47 acid concentration [13,14] etc.

48 In recent years, the need for standard and quality materials in the sectoral demands of  
49 medicinal and aromatic plants has revealed the necessity of cultivating these plants and has also  
50 accelerated the variety development activities. Characterization of genetic resources has always  
51 remained one of the favorite methods of scientific community for the development of improved  
52 cultivars expressing higher yield with better quality and secondary metabolite. Knowledge of  
53 the genetic diversity in the germplasm populations is important for the efficient germplasm  
54 management and long-term breeding programs.

55 Industrialized countries can produce high-yield and quality products at low cost by using  
56 advanced breeding and agricultural techniques in the agriculture of medicinal and aromatic  
57 plants [15]. As in all agricultural products, medicinal and aromatic plants with economic  
58 importance are also preferred in certain standards. A good number of studies have been  
59 conducted to explain the morphological, phenological, and agronomic variability among local  
60 populations of sweet basil in different parts of the world [1,4,13,14,16]. In our country, Telci et  
61 al. [17] more than 80 local basil genotypes which obtained from different regions in Turkey  
62 determined the characterization of morphology, agronomic and technological. Up to now,  
63 earlier studies with medicine and aromatic plants have been conducted with local populations,  
64 it is necessary to investigate genetically and chemically important overseas genotypes in  
65 addition to targeted cultivation and breeding practices for desired morpho-chemotypes.

66 For this purpose, the present study was conducted in order to compare for the first genetic  
67 linkage map of 73 abroad, one local (Bolu) basil genotypes and one cultivar which is expected  
68 to facilitate the researches on genetics and breeding in basil cultivars regarding their agro-  
69 morphological traits as well as their essential oil yield, and to find the relationships likely to  
70 exist between morphological traits and essential oil constituents. Also, in this study,  
71 morphological and phenological features of genotypes which show superior characteristics in  
72 terms of yield will be determined by characterizing UPOV according to various evaluation

73 criteria. Such information would be important to indicate the effect of geographic origin on  
74 agro-morphological and biochemical traits of basil seed cultivars. Promising basil cultivars can  
75 be used in various breeding programs and have the potential of enhancing its utilization.

## 76 2. Materials and Methods

### 77 2.1. Plant Material and Field Experiments

78 The experimental material comprised of seventyfour genotypes of basil (*Ocimum basilicum*)  
79 obtained from different geographical regions of the world (Supplementary Table 1). 73 basil  
80 genotypes, received from United States Department of Agriculture (USDA) with 4 commercial  
81 cultivars (Dino, midnight, large sweet, moonlight) and local basil genotype were used in this  
82 study. These cultivars were developed through the single plant selection having resistance to  
83 various diseases and have been used as standard cultivars. All of them was grown in 2017  
84 growing season, and except 14 genotypes (8 *Ocimum* × *africanum*, 3 *O. americanum* and 3 *O.*  
85 *basilicum*), adapted to Bolu ecological conditions (Table 1). In 2017, 59 genotypes, one local  
86 genotype and one cultivar were grown under field conditions in augmented design followed by  
87 selfing and single plant selection. Based on the adapted genotype, 50 genotypes were selected,  
88 and these genotypes were established in augmented design in 2018.

89 **Table 1. Plan ID, plant name and origin of basil genotypes.**

| No | Plant ID   | Plant name | Origin             | Taxonomy                |
|----|------------|------------|--------------------|-------------------------|
| 1  | PI 368699  | Edar       | Macedonia          | <i>Ocimum basilicum</i> |
| 2  | Bolu       | Bolu pop.  | Turkey/Bolu        | <i>Ocimum basilicum</i> |
| 3  | PI 414193  | B 49939    | US/Maryland        | <i>Ocimum basilicum</i> |
| 4  | Midnight   | Cultivar   | Turkey             | <i>Ocimum basilicum</i> |
| 5  | PI 211586  | 12832      | Afghanistan/ Kondo | <i>Ocimum basilicum</i> |
| 6  | PI 170578  | Fesligen   | Turkey/Aydin       | <i>Ocimum basilicum</i> |
| 7  | Dino       | Cultivar   | Turkey             | <i>Ocimum basilicum</i> |
| 8  | PI 253157  | Rayhoon    | Iran/Esfahan       | <i>Ocimum basilicum</i> |
| 9  | Ames 32314 | GE.2013-78 | Georgia            | <i>Ocimum basilicum</i> |
| 10 | PI 197442  | 10126      | Ethiopia           | <i>Ocimum basilicum</i> |
| 11 | Moonlight  | Cultivar   | Turkey             | <i>Ocimum basilicum</i> |
| 12 | PI 296391  |            | Iran               | <i>Ocimum basilicum</i> |

|    |             |                        |                       |                         |
|----|-------------|------------------------|-----------------------|-------------------------|
| 13 | PI 368697   | Vladimirska            | Macedonia             | <i>Ocimum basilicum</i> |
| 14 | Ames 32309  | GE.2013-21             | Georgia               | <i>Ocimum basilicum</i> |
| 15 | PI 414196   | B 49928                | US/Maryland           | <i>Ocimum basilicum</i> |
| 16 | PI 296390   |                        | Iran                  | <i>Ocimum basilicum</i> |
| 17 | PI 368695   | Zelen                  | Macedonia             | <i>Ocimum basilicum</i> |
| 18 | PI 358469   | Siten                  | Macedonia             | <i>Ocimum basilicum</i> |
| 19 | PI 652071   | Dark Opal              | US/California         | <i>Ocimum basilicum</i> |
| 20 | PI 174284   | Reyhan                 | Turkey/Van            | <i>Ocimum basilicum</i> |
| 21 | Ames 32310  | GE.2013-37             | Georgia               | <i>Ocimum basilicum</i> |
| 22 | PI 182246   | Reyhan                 | Turkey/Maraş          | <i>Ocimum basilicum</i> |
| 23 | PI 358471   | Sitnolisten            | Macedonia             | <i>Ocimum basilicum</i> |
| 24 | PI 414195   | B 19927                | US/Maryland           | <i>Ocimum basilicum</i> |
| 25 | PI 531396   | 1420                   | Hungary               | <i>Ocimum basilicum</i> |
| 26 | PI 172997   | Reyhan                 | Turkey/Kars           | <i>Ocimum basilicum</i> |
| 27 | PI 414199   | B 49931                | US/Maryland           | <i>Ocimum basilicum</i> |
| 28 | Ames 29184  | GSMO 2-19              | Georgia-South Ossetia | <i>Ocimum basilicum</i> |
| 29 | PI 358464   | Edrolisten             | Macedonia             | <i>Ocimum basilicum</i> |
| 30 | Ames 32311  | GE.2013-43             | Georgia               | <i>Ocimum basilicum</i> |
| 31 | PI 190100   | 1                      | Iran                  | <i>Ocimum basilicum</i> |
| 32 | PI 652070   | Sweet basil            | US/Pennsylvania       | <i>Ocimum basilicum</i> |
| 33 | PI 358468   | Krupnolisten           | Macedonia             | <i>Ocimum basilicum</i> |
| 34 | Ames 32312  | GE.2013-50             | Georgia               | <i>Ocimum basilicum</i> |
| 35 | PI 368700   | Edar                   | Macedonia             | <i>Ocimum basilicum</i> |
| 36 | PI 652065   | Genovese               | Italia/Veneto         | <i>Ocimum basilicum</i> |
| 37 | PI 379414   | Bel kripen             | Macedonia             | <i>Ocimum basilicum</i> |
| 38 | PI 652054   | Mrs. Burns Lemon Basil | US/Mexico             | <i>Ocimum basilicum</i> |
| 39 | PI 358466   | Krstaten               | Macedonia             | <i>Ocimum basilicum</i> |
| 40 | PI 358472   | Bitolski               | Macedonia             | <i>Ocimum basilicum</i> |
| 41 | PI 173746   | Reyhan                 | Turkey/Malatya        | <i>Ocimum basilicum</i> |
| 42 | PI 172996   | Reyhan                 | Turkey/Kars           | <i>Ocimum basilicum</i> |
| 43 | PI 207498   | 12648                  | Afghanistan/Kabul     | <i>Ocimum basilicum</i> |
| 44 | PI 176646   | Reyhan                 | Turkey/Tokat          | <i>Ocimum basilicum</i> |
| 45 | PI 414197   | B 49929                | US/Maryland           | <i>Ocimum basilicum</i> |
| 46 | PI 379412   | Krupen bel             | Macedonia             | <i>Ocimum basilicum</i> |
| 47 | PI 414198   | B 49930                | US/Maryland           | <i>Ocimum basilicum</i> |
| 48 | PI 414194   | B 49926                | US/Maryland           | <i>Ocimum basilicum</i> |
| 49 | PI 414200   | B 49932                | US/Maryland           | <i>Ocimum basilicum</i> |
| 50 | Large Sweet | Cultivar               | Turkey                | <i>Ocimum basilicum</i> |
| 51 | Ames 32313  | GE.2013-68             | Georgia               | <i>Ocimum basilicum</i> |
| 52 | PI 170579   | 2263                   | Turkey/İzmir          | <i>Ocimum basilicum</i> |
| 53 | PI 170581   | 3031                   | Turkey/Çanakkale      | <i>Ocimum basilicum</i> |
| 54 | PI 172998   | Reyhan                 | Turkey/Van            | <i>Ocimum basilicum</i> |
| 55 | PI 174285   | Reyhan                 | Turkey/Elazığ         | <i>Ocimum basilicum</i> |
| 56 | PI 175793   | Festagan               | Turkey/ Çanakkale     | <i>Ocimum basilicum</i> |
| 57 | PI 172998   | Reyhan                 | Turkey/Van            | <i>Ocimum basilicum</i> |
| 58 | PI 601365   | Purple Ruffles         | US/Pennsylvania       | <i>Ocimum basilicum</i> |
| 59 | PI 652053   | B 51668                | US, Maryland          | <i>Ocimum basilicum</i> |
| 60 | PI 652061   | NU 62505               | India                 | <i>Ocimum basilicum</i> |

|    |           |                |               |                           |
|----|-----------|----------------|---------------|---------------------------|
| 61 | PI 263870 |                | Greece        | <i>Ocimum basilicum</i>   |
| 62 | PI 358463 | Obicen bosilok | Macedonia     | <i>Ocimum basilicum</i>   |
| 63 | PI 358465 | Srednolisten   | Macedonia     | <i>Ocimum basilicum</i>   |
| 64 | PI 358467 | Domasen siten  | Macedonia     | <i>Ocimum basilicum</i>   |
| 65 | PI 358470 | Lokalen        | Georgia       | <i>Ocimum basilicum</i>   |
| 66 | PI 368698 | Srednolisten   | Macedonia     | <i>Ocimum basilicum</i>   |
| 67 | PI 379413 | Krupnolisen    | Macedonia     | <i>Ocimum basilicum</i>   |
| 68 | PI 500943 | ZM 1503        | Zambia        | <i>Ocimum x africanum</i> |
| 69 | PI 500944 | ZM 1551        | Zambia        | <i>Ocimum x africanum</i> |
| 70 | PI 500947 | ZM 1881        | Zambia        | <i>Ocimum x africanum</i> |
| 71 | PI 500949 | ZM 1974        | Zambia        | <i>Ocimum x africanum</i> |
| 72 | PI 500950 | ZM 2044        | Zambia        | <i>Ocimum x africanum</i> |
| 73 | PI 500951 | ZM 2282        | Zambia        | <i>Ocimum x africanum</i> |
| 74 | PI 500953 | ZM 2523        | Zambia        | <i>Ocimum x africanum</i> |
| 75 | PI 500954 | Lwena          | Zambia        | <i>Ocimum x africanum</i> |
| 76 | PI 253158 | Tokhm Sharbati | Iran, Eşfahān | <i>Ocimum americanum</i>  |
| 77 | PI 254352 | K1273          | Iraq          | <i>Ocimum americanum</i>  |
| 78 | PI 652062 | NU 61157       | Tanzania      | <i>Ocimum americanum</i>  |

90 \*1-78 (except 7, 11, 50) sown in 2017, \*\* 1-50 sown in 2018

91 The field experimental site was located at research and application area of Agriculture  
 92 and Natural Sciences Faculty, is between 40°44'45"N latitude, 31°37' 46"E longitudes with  
 93 altitude of 752m. In first experimental year, since genotypes have very few seeds (up to 100),  
 94 seeds were sown in a mixture of peat and perlite (9:1) on 19 april 2017. When the basil  
 95 seedlings reached 10 cm in plant height, seedlings were transplanted into pilots on 15 May 2017  
 96 at a rate of 5 plants m<sup>2</sup>. In second experimental year, seeds were sown directly by hand on the  
 97 field condition on 15 April 2018, each consisting of 4 m-long rows, row width and intra row  
 98 spacing were 30 cm and 20 cm, respectively.

99 Average climatic data were recorded 16.08 °C temperature; 41.37 mm rainfall; 69.2%  
 100 humidity during the vegetation period for 2017 and 17.10 °C temperature; 71.18 mm rainfall;  
 101 53.27% humidity in the growing season of 2018 [18]. Sweet basil was regularly irrigated to  
 102 demonstrate good progress in its period vegetation since irrigation is a very important factor for  
 103 cultivation of basil. As experimental factors, conventional fertilizer 60 kg ha<sup>-1</sup> Diammonium  
 104 phosphate (DAP) and 20 kg ha<sup>-1</sup> Ammonium sulfate (AS) were applied with sowing all

105 experimental years. Nitrogenous fertilizer as AS (in total 60 kg ha<sup>-1</sup>) was divided by two and  
106 applied to the plants in two splits in sown time and after first harvest of plant.

107 After each harvested, nitrogenous fertilizer as AS (in total 60 kg ha<sup>-1</sup>) was applied to  
108 the plants in two splits in July and August. Furthermore, when required, irrigation and weed  
109 control was made. Field data were collected by cutting randomly 10 plants from each plot, and  
110 the yield component of each plant was considered as the average for each plot in 2017 and 2018  
111 years.

112 Plants were harvested by hand when the plants reached at the beginning of flowering,  
113 cutting off the overground part of the stem above its lignified fragments, and in two phases in  
114 total, 20-30 cm above the ground level during each growing season. The first harvest was at the  
115 beginning of flowering, and started from the first week of July until the third week of August  
116 in all experimental years. The second harvest was at the beginning of flowering, and started  
117 from the last week of July until the first week of October in all experimental years.

118 During harvest height of plants, as well as number of branchings in the first row of main  
119 stem were measured, as well as the weight of plant overground part. Then the herb was dried  
120 in thermal drying compartment in the temperature of 35°C and the air-dry herb weight was  
121 determined.

## 122 **2.2. Morphological research and descriptor list**

123 Morphological research was carried out during the year 2017 and 2018 in the field trial. Each  
124 genotypes was represented by 10 plants and total of 610 and 500 plants were analyzed for  
125 morphological traits in 2017 and 2018, respectively. Twenty-three traits were scored according  
126 to the Guidelines for the Conduct of Tests for Distinctness, Uniformity and Stability (UPOV  
127 2003) in 2018 in which the qualitative traits were expressed in discontinuous states, while the  
128 expression of each quantitative trait was divided into a number of discrete states for the purpose  
129 of description (Table 2). All states are necessary to describe the full range of the traits, and

130 every form of expression can be described by a single state. Thus, all the recorded data were  
 131 qualitative in nature.

132 **Table 2. UPOV information of basil genotypes characteristic.**

| No            | Qualitative/Quantitative or Pseudo-qualitative Characteristic        | State           | Note | No          | Qualitative/Quantitative or Pseudo-qualitative Characteristic             | State               | Note                                  |
|---------------|----------------------------------------------------------------------|-----------------|------|-------------|---------------------------------------------------------------------------|---------------------|---------------------------------------|
| 1             | Plant: habit (PH)                                                    | rounded         | 1    | 13          | Leaf blade: glossiness (LBG)                                              | absent or very weak | 1                                     |
|               |                                                                      | intermediate    | 2    |             |                                                                           | weak                | 3                                     |
|               |                                                                      | erect           | 3    |             |                                                                           | medium              | 5                                     |
| 2             | Plant: density (PD)                                                  | loose           | 3    |             |                                                                           | strong              | 7                                     |
|               |                                                                      | medium          | 5    |             |                                                                           | very strong         | 9                                     |
|               |                                                                      | dense           | 7    |             |                                                                           | 14                  | Leaf blade: blistering (LBB)          |
| absent        | 1                                                                    | weak            | 3    |             |                                                                           |                     |                                       |
| present       | 9                                                                    | medium          | 5    |             |                                                                           |                     |                                       |
| 4             | Stem: intensity of anthocyanin coloration (SIAC)                     | weak            | 3    |             |                                                                           | strong              | 7                                     |
|               |                                                                      | medium          | 5    | 15          | Leaf blade: profile in cross section (LBPCS)                              | convex              | 1                                     |
|               |                                                                      | strong          | 7    |             |                                                                           | flat                | 2                                     |
| 5             | Stem: hairiness (SH)                                                 | absent          | 1    |             |                                                                           | concave             | 3                                     |
|               |                                                                      | present         | 9    | v-shaped    | 4                                                                         |                     |                                       |
| 6             | Stem : number of flowering shoots (at full flowering) (SNFS)         | one             | 1    | 16          | Leaf blade: serration of margin                                           | absent              | 1                                     |
|               |                                                                      | three           | 2    |             |                                                                           | present             | 9                                     |
|               |                                                                      | more than three | 3    |             |                                                                           | 17                  | Leaf blade: depth of serration (LBDS) |
| 7             | Leaf blade: shape (LBS)                                              | broad ovate     | 1    | medium      | 5                                                                         |                     |                                       |
|               |                                                                      | ovate           | 2    | deep        | 7                                                                         |                     |                                       |
| 8             | leaf blade: length (LBL)                                             | elliptic        | 3    | 18          | Petiole: length (PL)                                                      | short               | 3                                     |
|               |                                                                      | short           | 3    |             |                                                                           | medium              | 5                                     |
|               |                                                                      | medium          | 5    |             |                                                                           | long                | 7                                     |
| 9             | Leaf blade: width (LBW)                                              | long            | 7    | 19          | Flowering stem: average length of internodes (at end of flowering) (FSLI) | short               | 3                                     |
|               |                                                                      | narrow          | 3    |             |                                                                           | medium              | 5                                     |
|               |                                                                      | medium          | 5    |             |                                                                           | long                | 7                                     |
| 10            | Leaf blade: intensity of anthocyanin coloration of upper side (LBAC) | broad           | 7    | 20          | Flowering stem: total length (at end of flowering) (FSTL)                 | short               | 3                                     |
|               |                                                                      | weak            | 3    |             |                                                                           | medium              | 5                                     |
|               |                                                                      | medium          | 5    |             |                                                                           | long                | 7                                     |
| 11            | Leaf blade: distribution of anthocyanin (LBDA)                       | strong          | 7    | 21          | Flowering stem: hairiness of bracts (FSHB)                                | absent              | 1                                     |
|               |                                                                      | few mottles     | 1    |             |                                                                           | present             | 9                                     |
|               |                                                                      | many mottles    | 2    |             |                                                                           | 22                  | Flower: color of corolla (FC)         |
| total surface | 3                                                                    | pink            | 2    |             |                                                                           |                     |                                       |
| 12            | Varieties without anthocyanin only: Leaf blade: green color (LBGC)   | light           | 3    | dark violet | 3                                                                         |                     |                                       |
|               |                                                                      | medium          | 5    | 23          | Flower: color of style (FCS)                                              | white               | 1                                     |
|               |                                                                      | dark            | 7    |             |                                                                           | light violet        | 2                                     |

133



### 134 **2.3. Essential oil extraction and analysis**

135 A Clevenger device was used to obtain essential oil of basil by hydro-distillation. Fifty g of  
136 basil flowering aerial parts were taken from each treatment. Afterward, they were roughly  
137 crushed and placed in a 1-L glass balloon to which 500 mL of distilled water were added.  
138 Distillation was conducted for three h to obtain the essential oil content. Once collected in a  
139 sealed glass vials, the essential oil was dehydrated anhydrous sodium sulfate and stored at 4°C  
140 in darkness until analyses.

### 141 **2.4. Data analysis**

142 The differences among the basil genotypes were analysed through least significant differences  
143 (LSD) tests at 0.05 level of significance. Statistics included mean, range (minimum, maximum),  
144 coefficient of variation (CV) and standard deviations in 2017 and 2018 years. Cluster analysis  
145 was performed depending on the leaf shape and color of basil genotypes in 2017 and also, it  
146 was carried depending on the UPOV criteria among the basil genotypes using Ward's method  
147 and squared Euclidian distance in 2018 experimental year [19,20]. Principal component  
148 analysis (PCA) and correlation analysis were conducted to determine the relationships among  
149 the morphological and yield properties of basil genotypes obtained in experimental years.

## 150 **3. Results and Discussion**

### 151 **3.1 Observations**

152 All phenotypic traits showed variation among the genotypes examined. Our results show that  
153 with a careful analysis and stringent selection of traits, morphological markers provide an  
154 inexpensive and reliable method for routine screening of a large number of genotypes, in order  
155 to monitor and manage germplasm collections.

156 The selection and choice of parents also depends upon the contribution of characters  
157 towards the genetic divergence (Table 3 and 4). Among the five characters studied, contribution

158 percentage/fold was recorded maximum for branches/plant (27.69 %), followed by plant height  
159 (28.68%), days to 50% flowering (64.37%), oil content (about twenty fold), herb yield/plant  
160 (about eighteen fold) in 2017 experimental year, maximum for branches/plant (40.63 %),  
161 followed by plant height (32.7%), days to 50% flowering (73.63%), oil content (about  
162 twentyseven fold), in 2018 experimental year. Hence, these characters could be given due  
163 importance.

164 Phenological observations of each genotypes were recorded, five a week. The number  
165 of days on which observations on seedling were made 2.88-8.38 in 2017, 23 -53 in 2018.  
166 Observations on flowering day for first cutting were made 56.92-88.42 in 2017, 73-101.6 in  
167 2018. During harvesting, the dates that basils were collected from each genotypes were  
168 recorded in experimental years.

169 Our results were also in harmony with Srivastava et al. [21] noted that basil harvest  
170 takes about 85-90 days for maturity, when lower leaves start turning yellow and full blooming  
171 condition appears. Similarly, Bahl et al. [22] reported that three different basil genotypes (CIM-  
172 Saumya, CIM-Snigdha, CIM-Surabhi) matured in 80-100 days.

173 Leaf shape and leaf color were observed in 61 genotypes in 2017 year. Leaf shape of  
174 basil genotypes were divided to 12 different properties (4 entire-big, 1 entire-medium, 5 entire-  
175 small, 2 lettuce-serrate-big, 1 lettuce-serrate-small, 5 serrate-big, 5 serrate-medium, 2 serrate-  
176 small, 4 true-serrate, 21 true-serrate-big, 7 true-serrate-medium, 4 true-serrate-small). About  
177 35% of basil genotypes had similar leaf shape being true-serrate big. Leaf colors of basil  
178 genotypes were found into three categories as green (46 genotypes), purple (4 genotypes) and  
179 purple-green (11 genotypes) in 2017 (Table 3).

180 In a study by Darrah [23], who classified the *O. basilicum* genotypes into seven  
181 categories: (1) tall slender types, (the sweet basil group); (2) large-leafed robust types (‘lettuc  
182 leaf’ also called ‘Italian’ basil); (3) dwarf types, which are short and small leafed (‘bush’ basil);

183 (4) compact types, also described *O. basilicum* var. *thyrsiflora* ('Thai' basil); (5) *purpurascens*,  
184 the purple-colored basil types with traditional sweet basil flavor; (6) purple types ('Dark Opal':  
185 hybrid between *O. basilicum* and *O. forskolei* with a sweet basil plus clove-like aroma); and (7)  
186 *citriodorum* types (lemon-flavored basils).

187 Leaf shape and color of our basil genotypes were found similar with Darrah [25].

188 Egata et al. [24] recorded the morpho-agronomic variability to further select promising  
189 sweet basil accessions in Ethiopia. Singh et al. examined the genetic diversity and clustering  
190 pattern among 20 five basil accessions and found oil content was the highest contributing  
191 character toward the genetic diversity (56.09%). Srivastava et al. [21] studied 60 *O. basilicum*  
192 accessions and found some unique chemotypes which could be further exploited in future  
193 breeding programs. Carović-Stanko et al. [16] studied the resolving power of morphological  
194 traits for reliable identification of *O. basilicum* accessions and categorized six clusters of basil  
195 morphotypes.

### 196 **3.2. Morphological parameters (plant height and number of branches)**

197 The following morphological parameters were determined the plant height and number of  
198 branches. Plant height was determined two times before each sampling by measuring the height  
199 of ten randomly selected plants per plot from the soil to the top of the plant and getting an  
200 average value for each plot. These quantitative traits were investigated on the basis of the basil  
201 descriptors developed by the International Union for the Protection of New Varieties of Plants  
202 (UPOV, 2003) and were determined on ten randomly selected plants from the center rows of  
203 each cultivar. As can be seen in Table S3 and S4, significant differences were observed between  
204 the studied cultivars for growth parameters.

205 There were statistical significant differences among harvests for different genotypes  
206 with respect to the plant height in two experimental years. The presence of difference between  
207 the highest and the lowest values indicated that the genotypes included in the present study

208 were quite diverse. In first year, while the highest plant height was obtained from Ames 32312  
209 (57.07 cm) followed by PI 253157 (53.67 cm), and PI 172998 (47.58 cm) in first harvest, the  
210 highest plant height was obtained from PI 253157 (44.91 cm) followed by midnight (40.95 cm),  
211 and Bolu (40.76 cm) in second harvest. The highest average plant heights were recorded in  
212 Bolu (47.46 cm), PI 253157 (46.77 cm), Ames 32312 (45.62 cm), midnight (44.40 cm)  
213 genotypes. In second year, PI 253157 (71.90 cm) PI 170578 (68.10 cm) and PI 531396 (64.00  
214 cm) genotypes have the highest plant height, whereas PI 173746 (18.00 cm), Moonlight (29.12  
215 cm) have the lowest plant height in first harvest. In the second harvest, the highest plant height  
216 was recorded in PI 296390 (64.90 cm), followed by PI 296391 (60.10 cm) and Ames 32314  
217 (52.70 cm) genotypes, while the lowest plant height was Large sweet (16.10 cm) and Moonlight  
218 (20.75 cm) cultivars. The highest average plant height was found at PI 296390 (58.10 cm)  
219 genotype, followed by PI 253157 (56.35 cm) and PI170578 (56.35 cm) genotypes. Especially,  
220 PI 253157 genotype have the highest plant height in experimental years.

221 The analysis of variance indicated the presence of considerable variability among the  
222 genotypes for the number of branches which was found to be highly significant ( $p=0.05$ ) (Table  
223 3). In addition, number of branches showed significant interaction of the different factors that  
224 were studied.

225 The number of branches was affected by genotypes, and by the interaction of year with  
226 genotype and harvest times. The genotype with the more branches was PI 175793 (20.67  
227 number plant<sup>-1</sup>), followed by the PI 170579 (19.43 number plant<sup>-1</sup>), PI 358469 (13.48 number  
228 plant<sup>-1</sup>), Ames 32309 (12.96 number plant<sup>-1</sup>) and PI 368698 (12.95 number plant<sup>-1</sup>) genotypes.  
229 The genotype with the lowest number of branches was PI 652071(5.7 number/plant) followed  
230 by the PI 174285 (6.81 number plant<sup>-1</sup>) and PI 368700 (7.18 number plant<sup>-1</sup>) genotypes in first  
231 year. In the second year, the highest branch numbers were observed in PI 197442 (14.90 number  
232 plant<sup>-1</sup>), PI 211586 (13.50 number plant<sup>-1</sup>), PI 182426 (12.67 number plant<sup>-1</sup>) genotypes, the

233 lowest branch numbers were observed in PI176646 (6.0 number plant<sup>-1</sup>), Dino (6.66 number  
234 plant<sup>-1</sup>), PI174284 (6.70 number plant<sup>-1</sup>) genotypes in first harvest. Moreover, the genotypes PI  
235 414200 and PI 652054 showed the significantly and remarkably higher branch numbers and  
236 ranged between 20.00- 18.67 number whereas, the lower one was observed in the registered  
237 genotype PI172996 (5.90 number) in second harvest. In addition, average the highest branch  
238 number was found at PI 414200 (16.00 number), followed by PI 358472 (13.50 number) and  
239 PI 652054 (13.00 number) genotypes.

240 The mean values of number of branches at the first year were higher than those of the  
241 second years, which was related to their height and habit, and all experimental years the highest  
242 branch numbers were obtained from first harvests. Based on our experimental results, there  
243 were significant differences between the two years of the experiments, and this can be because  
244 of the weather conditions as in 2018 the temperature was higher in vegetative growth period  
245 and the rainfall was much lower [18].

246 The examined basil cultivars had significant mean plant height (13.67-71.90 cm) in  
247 experimental years.

248 In earlier studies Egata et al. [24] reported that variability of combined analysis result  
249 on quantitative traits of Ethiopian sweet basil genotypes showed wide range in; number of  
250 primary branch/plant 6.08 to 8.98, number of internodes/main stem varies from 4.68 to 6.80,  
251 plant height 24.43 to 42.24 cm. Likewise, Alemu et al. [26] indicated that plant height was  
252 significantly affected by genotype, plant spacing, and they also reported that plant height  
253 changed from 52 to and 32 cm. Similarly, the plant height of different basil genotypes found  
254 at 20-60 cm [27], 22.9-57.0 cm [12], 40.0-76.9 cm [28], 60.89 cm [29], 65-88 cm [30], 69.7-  
255 89.5 cm [31] and 37.9-98.7 cm [32,33], 59.28-62.5 cm [34], 35.40-73.07 cm 35.40-73.07 cm  
256 [35], 24.43-42.24 cm [24], 17,16-45.33 cm [36], 74-80 cm [42] under different ecological  
257 conditions. Also, the morphological characters of 80 genotypes of *O. basilicum* from different

258 geographical regions (India, Singapore, Tanzania, Thailand, and Slovak Republic) revealed a  
259 wide range of variation among themselves, viz. plant height (56-126 cm) [37-41].

260 The present results that we determined comply with the mentioned results with respect  
261 to plant height for two experimental years.

262 The examined basil cultivars had significant mean branch number (3.28-19.43  
263 number/plant) in experimental years. These data corroborate with those reported by Egata et al.  
264 [24] (5.87-9.60 branches plant<sup>-1</sup>), 11.3-13.5 branches plant<sup>-1</sup> [31], 10-12 branches plant<sup>-1</sup> [30],  
265 9.3 to 9.67 branches plant<sup>-1</sup> [35], however, these data much lower than those of 8-41 branches  
266 plant<sup>-1</sup> [42]. The number of branches was affected by the irrigation, cultivar, and the interaction  
267 of cultivar and year, growth stage and year, and the interaction of cultivar, year, and growth  
268 stage. Morphological characteristics, such as number of branches, are affected by irrigation,  
269 fertilization, and cultivar [43].

### 270 **3.3. Fresh and dry weight**

271 The analysis of variance revealed that there was an abundant scope for selection of promising  
272 lines from the present genetic stock for fresh and dry weight. The fresh and dry herb weights  
273 were changed by growth stages, year, and genotypes. The presence of huge difference between  
274 the highest and the lowest values indicated that the genotypes included in the present study  
275 were quite diverse in all experimental years.

276 In 2017, the genotypes were collected from Georgia (Ames 32312) and Macedonia (PI 358469)  
277 region and the character making it distinct was the high fresh yield plant<sup>-1</sup> (250.18 g plant<sup>-1</sup>,  
278 230.02 g plant<sup>-1</sup>, respectively), in contrast to other genotypes which showed fresh herb yield in  
279 the range of 14.24 -156.71 g plant<sup>-1</sup>. Among the sixty genotypes, the highest dry weight was  
280 found Ames 32312 (30.93 g plant<sup>-1</sup>), followed by PI 414193 (23.70 g plant<sup>-1</sup>), PI 414199 (23.70  
281 g plant<sup>-1</sup>), PI 211586 (23.63 g plant<sup>-1</sup>); however, the lowest dry weight was obtained from PI  
282 652071 (2.04 g plant<sup>-1</sup>) and PI 379414 (2.15 g plant<sup>-1</sup>) genotypes.

283 In 2018, the highest fresh weight was obtained from PI 172997 (274.11 g plant<sup>-1</sup>),  
284 followed by PI358466 (134.78 g plant<sup>-1</sup>) and Bolu (106.76 g plant<sup>-1</sup>) genotypes, in contrast to  
285 other genotypes which showed herb yield in the range of 12.94-101,83 g plant<sup>-1</sup> in 2018  
286 experimental year. The lowest was found at PI 379414(12.94 g plant<sup>-1</sup>) and PI 176646 (13.17 g  
287 plant<sup>-1</sup>) genotypes The genotype that showed the highest dry weight was PI 172997 (27.49 g  
288 plant<sup>-1</sup>), followed by PI358466 (21.39 g plant<sup>-1</sup>) and PI379412 (16.25 g plant<sup>-1</sup>) in second years;  
289 however, the lowest dry weight was found PI 531396 (1.0 g plant<sup>-1</sup>) and PI 414194 (1.27 g  
290 plant<sup>-1</sup>) genotypes. Most of the genotypes had yields greater than 50 g plant<sup>-1</sup> fresh herbage,  
291 which are considered very high. Our results suggest that most basil genotypes can provide high  
292 yields under Bolu ecological condition. Especially, PI 172997, Ames 32312, PI 358469  
293 genotypes were foremost in experimental years.

294 The examined basil cultivars had significant fresh herb yields in first experimental year  
295 (17.18-250.18 g/plant) and in second experimental year (12.94-274.11 g/plant) (Table 3 and  
296 4). The examined basil cultivars had significant dry herb yields in first experimental year (2.04-  
297 30.93 g/plant) and in second experimental year (1.0-27.49 g/plant) (Table 3 and 4).

298 The results of the present study are in a good agreement with those of the study by Egata  
299 et al. [24], who reported that fresh leaf weight/plant varied from 44.58 g to 231.53 g, and also  
300 noted that maximum dry weight/plant ranged from 10.06 to 31.57 g in Ethiopian sweet basil  
301 genotypes. Likewise, previous studies have reported a range of values for fresh weight of  
302 different basil cultivars from 240.2 to 1105.9 g m<sup>-2</sup> and dry weight was in the range of 47.9-  
303 202.8 g m<sup>-2</sup> [44-46].

304 Similarly, dry herb weight plant<sup>-1</sup> varied from 7.26-10.78 g under stress condition [47],  
305 and ranged from 5.5-7.1 g grown with different temperature integration doses [48]. Our results  
306 agree with those obtained by previous literature.

307 By contrast, Kalamartzis et al. [49] determined the effect of water stress on five  
308 cultivars of basil (Mrs Burns, Cinnamon, Sweet, Red Rubin, Thai) were found to be within the  
309 ranges of 378.5-4357.5 g m<sup>-2</sup> for fresh herb, 65.8-922.5 g m<sup>-2</sup> for dry herb. In addition, Karaca  
310 et al. [36] determined that fresh herb yield and dry herb yield of nine basil genotypes were  
311 found to be within the ranges of 195.00-383.99 g plant<sup>-1</sup>, 22.21-46.85 g plant<sup>-1</sup>, respectively.  
312 Köse et al. [50] also, indicated that effect of plant density on fresh herbage yield of sweet basil  
313 was in the range of 192.00-464.70 g plant<sup>-1</sup> and dry weight was in range 52.90-9.98 g plant<sup>-1</sup>.  
314 Furthermore, Arslan et al. [51] noted the fresh and dry yield of *O. basilicum* in the range of  
315 192.00-464.70, also 24.3-55.2 g under the Eastern Mediterranean condition, respectively.

316 The observed differences in the fresh and dry plant herb yield across countries may be  
317 a result of different environmental and genetic factors, different chemotypes, harvest time,  
318 weather conditions and the cultural practices.

### 319 **3.4. Essential oil content**

320 Essential oil content was affected by growth stages, year, cultivar, and also by their interactions  
321 (Table 3, 4). It was found that the significant differences were seen among the used fennel  
322 genotypes in terms of essential oil content at p<0.05 (Table 3). The highest essential oil content  
323 was found at PI 358469 (1.71 %), followed by PI 207498 (1.12%), PI 414199 (0.87%), PI  
324 197442 (0.83 %) in first experimental year. The lowest essential oil content was found at PI  
325 379413 (0.05 %) (Table 3 and 4).

326 The highest essential oil content was found at Ames 32309 (1.07 %), followed by PI  
327 172996 (0.98%) and large sweet (0.98%) in second years. The lowest essential oil content was  
328 found at PI 379414 (0.04 %) and PI 296390 (0.13%) genotypes.

329 Great variations in the essential oil content of *O. basilicum* across geographic regions  
330 might be attributed to variable agroclimatic conditions and different agronomic techniques for  
331 cultivating [52,53]. The essential oil yield (0.04-1.71%) in the present study was comparable to



332 that in a study by Egata et al. [24], who found the range of 0.10-1.02 % leaf essential oil content  
333 dry weight base for Ethiopian sweet basil genotypes. Similarly, Karaca et al. [36] determined  
334 that essential oil content of in nine basil genotypes were found to be within the ranges of 0.25-  
335 1.06%. Also Beatović et al. [54] reported that the essential oil yields of twelve *Ocimum*  
336 *basilicum* L. cultivars grown in Serbia ranged from 0.65 to 1.90 %.

337 Likewise, Telci et al. [12] reported values for essential oil content between 18 genotypes  
338 ranging from 0.4% to 1.5%. Zheljaskov et al. [4] recorded that essential oil content of the tested  
339 38 genotypes a grown in Mississippi varied from 0.07% to 1.92% in dry herbage in the field  
340 experiment. It was reported that essential oil yield of the air-dried overground parts of *Ocimum*  
341 *basilicum* from Turkey as obtained by hydrodistillation was 1.25% [55]. Juliani et al. [56]  
342 reported basil oil content from 0.6 to 1.7% dry herbage. The yield of essential oil from different  
343 plant parts varies between 0.15-1.59%, and it depends also on the seasonal factor and locality  
344 [57-62].

345 By contrast, Simon et al. [5] reported the essential oil content from 0.04% to 0.70% (v  
346 fresh weight<sup>-1</sup>) in a study of a large number of basil genotypes. In addition, the content and  
347 composition of the essential oil have been evaluated in 14 *O. basilicum* genotypes, and reported  
348 that varied from 0.59 to 2.30% (genotype no. 6) [63]. Furthermore, in four *Ocimum* species  
349 grown in Tanzania (Runyoro et al., 2010), the essential oil yields ranged from 0.5% to 4%.

350 According to our study, the USDA genotypes were higher in its content of essential oil  
351 in compare with the local genotypes. Based on essential oil content (Table 4), PI 358469  
352 originating from Macedonia and Ames 32309 originating from Georgia are the best genotypes,  
353 which are the different from the other genotypes.

354 In general, the essential oil content of basil genotypes in this study was within the usual  
355 content reported in other studies [4,24,64]; however, Runyoro et al. [65] and Akçali Giachino  
356 et al. [63] results that were higher than our results. Differences in basil essential oil content

357 between this study and another report from research could be due to differential environmental  
358 conditions, their genetics and growth conditions [66,67].

359

360

361 **Table 3. Morphological traits of basil genotypes in 2017.**

| No | Genotypes  | Plant Name    | Country/Province   | GD (days) | FHPH (cm) | SHPH (cm) | APH (cm) | NB (no plant <sup>-1</sup> ) | DFT (days) | FHW 1 (g plant <sup>-1</sup> ) | FHW 2 (g plant <sup>-1</sup> ) | TFHW (g plant <sup>-1</sup> ) | DHW 1 (g plant <sup>-1</sup> ) | DHW 2 (g plant <sup>-1</sup> ) | TDHW (g plant <sup>-1</sup> ) | EO (%) | Leaf Shape            | Leaf Color   |
|----|------------|---------------|--------------------|-----------|-----------|-----------|----------|------------------------------|------------|--------------------------------|--------------------------------|-------------------------------|--------------------------------|--------------------------------|-------------------------------|--------|-----------------------|--------------|
| 1  | PI 358466  | Krstaten      | Macedonia          | 4.88e     | 33.79j-s  | 34.52a-i  | 34.29d-r | 8.21j-r                      | 69.42ijk   | 75.98a-d                       | 10.64e-h                       | 86.62c-h                      | 3.63b-e                        | 0.68hij                        | 4.30r-v                       | 0.08lm | Entire-Medium         | Green        |
| 2  | PI 652071  | Dark Opal     | US/California      | 5.88c     | 28.32n-v  | 27.22c-r  | 27.91l-v | 5.71r                        | 69.42ijk   | 61.73bcd                       | 9.69e-h                        | 71.41c-h                      | 1.36de                         | 0.69hij                        | 2.04v                         | 0.17e  | Serrate-Medium        | Purple       |
| 3  | PI 172996  | Reyhan        | Turkey/Kars        | 4.88e     | 39.79c-l  | 44.62a    | 42.34a-f | 12.54bcd                     | 61.42r-u   | 77.91a-d                       | 25.30c-h                       | 103.21c-h                     | 5.09b-e                        | 2.83b-j                        | 7.92l-v                       | 0.50K  | Serrate-Medium        | Green        |
| 4  | PI 174285  | Reyhan        | Turkey/Elazığ      | 4.88e     | 40.21c-l  | 41.82ab   | 41.15a-g | 6.81qr                       | 64.42n-q   | 88.18a-d                       | 31.85c-h                       | 120.03b-h                     | 4.92b-e                        | 3.33b-j                        | 8.25l-v                       | 0.18d  | Lettuce-Serrate-Small | Purple-Green |
| 5  | PI 652065  | Genovese      | Italia/Veneto      | 5.88c     | 39.92c-l  | 35.11a-h  | 37.65a-l | 8.14j-r                      | 67.92jkl   | 2.77d2                         | 26.28c-h                       | 29.05fgh                      | 0.48e                          | 4.28b-j                        | 4.76p-v                       | 0.06o  | True-Serrate-Big      | Green        |
| 6  | PI 358465  | Srednolisten  | Macedonia          | 3.88f     | 31.26l-u  | 29.11b-p  | 30.33h-t | 8.84f-r                      | 73.92ef    | 3.64d                          | 106.35a                        | 109.99c-h                     | 0.47e                          | 12.64a                         | 13.10e-o                      | 0.06o  | True-Serrate-Big      | Green        |
| 7  | PI 358467  | Domasen siten | Macedonia          | 4.88e     | 27.82o-v  | 29.31b-o  | 28.70k-u | 10.44b-o                     | 69.92hij   | 4.29cd                         | 13.53e-h                       | 17.82h                        | 1.21de                         | 1.25d-j                        | 2.46uv                        | 0.21b  | True-Serrate-Small    | Green        |
| 8  | PI 170581  | 3031          | Turkey/Çanakkale   | 5.88c     | 21.72uvy  | 13.44rs   | 17.72vy  | 7.24o-r                      | 73.92ef    | 8.34cd                         | 19.42e-h                       | 27.76fgh                      | 1.06de                         | 2.60b-j                        | 3.66s-v                       | 0.75E  | Entire-Small          | Green        |
| 9  | PI 379414  | Bel kripen    | Macedonia          | 4.88e     | 24.94s-y  | 15.11p-s  | 20.17t-y | 7.49n-r                      | 65.92l-o   | 8.85cd                         | 5.39fgh                        | 14.24h                        | 1.80cde                        | 0.34ij                         | 2.15v                         | 0.23Z  | Entire-Big            | Green        |
| 10 | PI 253157  | Rayhoon       | Iran/Esfahan       | 5.38d     | 53.67ab   | 44.91a    | 46.77ab  | 11.84b-h                     | 70.92ghi   | 50.43bcd                       | 7.54fgh                        | 57.97e-h                      | 11.10a-e                       | 0.70hij                        | 11.81g-r                      | 0.16f  | True-Serrate-Big      | Green        |
| 11 | PI 414193  | B 49939       | US/Maryland        | 6.38b     | 38.27c-m  | 26.11e-r  | 29.67i-u | 9.94c-q                      | 69.92hij   | 127.68abc                      | 21.95d-h                       | 149.62a-e                     | 21.31ab                        | 2.39b-j                        | 23.70ab                       | 0.07n  | True-Serrate-Big      | Green        |
| 12 | PI 368699  | Edar          | Macedonia          | 6.38b     | 34.57i-s  | 26.91c-r  | 28.22k-v | 10.84b-l                     | 65.92l-o   | 77.24a-d                       | 12.29e-h                       | 89.53c-h                      | 15.61a-e                       | 0.77hij                        | 16.38b-k                      | 0.23Z  | True-Serrate-Medium   | Green        |
| 13 | PI 211586  | 12832         | Afghanistan/Kondoz | 8.38a     | 35.57h-q  | 26.58e-r  | 28.56k-u | 11.74b-h                     | 64.92m-p   | 126.49a-d                      | 0.50h                          | 126.99b-h                     | 21.30ab                        | 2.33b-j                        | 23.63ab                       | 0.36R  | True-Serrate-Small    | Purple-Green |
| 14 | PI 175793  | Festagan      | Turkey/Çanakkale   | 6.38b     | 40.30c-l  | 33.17a-l  | 34.22d-r | 20.67a                       | 79.92bc    | 58.67bcd                       | 4.49gh                         | 63.16e-h                      | 12.28a-e                       | 1.99b-j                        | 14.26d-m                      | 0.18d  | Entire-Small          | Green        |
| 15 | PI 368700  | Edar          | Macedonia          | 4.88e     | 23.17t-y  | 17.55n-s  | 20.50s-y | 7.18pqr                      | 65.92l-o   | 31.89bcd                       | 40.57bh                        | 72.46c-h                      | 3.82b-e                        | 1.92c-j                        | 5.74o-v                       | 0.45L  | Entire-Small          | Green        |
| 16 | PI 652070  | Sweet basil   | US/Pennsylvania    | 4.88e     | 44.67b-h  | 28.88b-p  | 36.92a-m | 10.09c-p                     | 65.92l-o   | 123.30a-d                      | 64.71bc                        | 188.01abc                     | 15.13a-e                       | 5.35b-i                        | 20.49b-e                      | 0.22a  | Serrate-Big           | Green        |
| 17 | PI 358468  | Krupnolisten  | Macedonia          | 4.88e     | 35.47h-r  | 19.63k-s  | 27.69l-v | 8.49i-r                      | 60.92r-u   | 5.63cd                         | 25.17c-h                       | 30.80fgh                      | 1.87cde                        | 0.82hij                        | 2.69tuv                       | 0.51J  | Serrate-Medium        | Green        |
| 18 | Ames 32312 | GE.2013-50    | Georgia            | 4.88e     | 57.07a    | 33.88a-j  | 45.62abc | 8.99e-q                      | 67.92jkl   | 188.96a                        | 61.22bcd                       | 250.18a                       | 26.13a                         | 4.80b-j                        | 30.93a                        | 0.24Y  | Serrate-Big           | Purple-Green |
| 19 | PI 190100  | 1             | Iran               | 3.88f     | 38.12c-n  | 26.63d-r  | 32.52f-r | 12.09b-e                     | 60.92r-u   | 14.98cd                        | 28.03c-h                       | 43.01e-h                      | 1.27de                         | 1.04f-j                        | 2.31uv                        | 0.09k  | Serrate-Medium        | Purple-Green |

|    |            |              |                       |       |          |          |          |          |          |           |          |           |          |         |          |        |                     |              |
|----|------------|--------------|-----------------------|-------|----------|----------|----------|----------|----------|-----------|----------|-----------|----------|---------|----------|--------|---------------------|--------------|
| 20 | PI 368697  | Vladimirska  | Macedonia             | 3.88f | 26.07q-v | 14.18q-s | 20.27t-y | 7.93k-r  | 57.92vy  | 53.66bcd  | 25.88c-h | 79.54c-h  | 8.42a-e  | 1.75c-j | 10.17i-t | 0.09j  | True-Serrate-Small  | Green        |
| 21 | Ames 32309 | GE.2013-21   | Georgia               | 4.88e | 45.87b-e | 24.98f-s | 35.57c-p | 12.96bc  | 64.92m-p | 104.13a-d | 21.67d-h | 125.80b-h | 6.79b-e  | 1.59c-j | 8.38l-v  | 0.08kl | True-Serrate-Small  | Purple-Green |
| 22 | PI 414196  | B 49928      | US/Maryland           | 5.88c | 47.57abc | 22.28g-s | 35.07c-q | 7.23pqr  | 61.92q-u | 72.83a-d  | 18.21e-h | 91.04c-h  | 10.58a-e | 1.45c-j | 12.03g-q | 0.16f  | Entire-Big          | Green        |
| 23 | PI 296390  |              | Iran                  | 3.88f | 45.77b-f | 33.12a-l | 39.58a-j | 9.83c-q  | 65.92l-o | 115.15a-d | 23.59d-h | 138.74a-g | 18.75a-e | 3.71b-j | 22.46bc  | 0.11h  | Entire-Big          | Purple-Green |
| 24 | PI 368695  | Zelen        | Macedonia             | 4.88e | 27.57o-v | 20.38i-s | 24.12r-y | 10.33b-p | 66.92k-n | 101.62a-d | 20.05e-h | 121.68b-h | 15.89a-e | 1.16f-j | 17.05b-k | 0.43N  | Entire-Big          | Green        |
| 25 | Ames 32313 | GE.2013-68   | Georgia               | 5.88c | 19.42vy  | 19.16l-s | 19.43uvy | 9.99c-q  | 60.42s-v | 69.53a-d  | 11.78e-h | 81.31c-h  | 11.53a-e | 3.59b-j | 15.12c-l | 0.19c  | Serrate-Small       | Green        |
| 26 | PI 414195  | B 19927      | US/Maryland           | 4.88e | 25.72r-v | 21.56h-s | 23.78r-y | 10.19c-p | 64.42n-q | 60.80bcd  | 11.9e-h  | 72.73c-h  | 9.39a-e  | 2.33b-j | 11.72g-r | 0.22a  | Serrate-Big         | Green        |
| 27 | PI 531396  | 1420         | Hungary               | 4.88e | 30.82l-u | 18.56m-s | 24.83q-v | 10.19c-p | 64.42n-q | 95.89a-d  | 20.49d-h | 116.38b-h | 10.10a-e | 1.78c-j | 11.88g-r | 0.62H  | Serrate-Big         | Green        |
| 28 | PI 368698  | Srednolisten | Macedonia             | 4.88e | 30.62l-u | 21.89g-s | 26.40m-v | 12.95bc  | 69.42ijk | 49.07bcd  | 38.42c-h | 87.49c-h  | 6.70b-e  | 6.39bc  | 13.08e-o | 0.37Q  | True-Serrate        | Green        |
| 29 | PI 172997  | Reyhan       | Turkey/Kars           | 4.88e | 43.62c-i | 33.36a-k | 38.63a-k | 7.59m-r  | 59.42uvy | 95.59a-d  | 16.10e-h | 111.70c-h | 16.72a-e | 5.05b-j | 21.78bcd | 0.32T  | True-Serrate        | Green        |
| 30 | PI 414199  | B 49931      | US/Maryland           | 4.88e | 35.22h-r | 39.36a-e | 37.43a-l | 10.19c-p | 67.92jkl | 119.85a-d | 36.86c-h | 156.71a-e | 17.39a-e | 6.30bc  | 23.70ab  | 0.87C  | True-Serrate        | Green        |
| 31 | Ames 29184 | GSMO 2-19    | Georgia/South Ossetia | 4.88e | 39.12c-m | 38.36a-f | 38.88a-k | 10.29b-p | 66.92k-n | 93.26a-d  | 43.40b-g | 136.65a-g | 15.80a-e | 6.26bcd | 22.06bc  | 0.65G  | Serrate-Big         | Purple       |
| 32 | PI 379413  | Krupnolisen  | Macedonia             | 4.88e | 37.72d-n | 29.36b-o | 33.68e-r | 12.99bc  | 72.92fg  | 127.47abc | 22.75d-h | 150.23a-e | 19.42a-d | 3.6b-j  | 23.09b   | 0.05p  | Serrate-Small       | Green        |
| 33 | Ames 32311 | GE.2013-43   | Georgia               | 4.88e | 45.42b-g | 34.56a-h | 40.13a-i | 8.69g-r  | 72.92fg  | 71.50a-d  | 42.03b-g | 113.52b-h | 11.27a-e | 5.54b-h | 16.81b-k | 0.21b  | Lettuce-Serrate-Big | Purple       |
| 34 | PI 358464  | Edrolisten   | Macedonia             | 4.88e | 30.82l-u | 29.36b-o | 30.23h-t | 7.79l-r  | 62.92prs | 84.64a-d  | 20.51d-h | 105.15c-h | 14.65a-e | 3.10b-j | 17.75b-i | 0.18d  | Serrate-Medium      | Green        |
| 35 | PI 414197  | B 49929      | US/Maryland           | 3.88f | 33.47j-s | 30.86a-n | 32.30f-r | 8.64h-r  | 62.92prs | 94.70a-d  | 31.85c-h | 126.56b-h | 12.22a-e | 0.11j   | 12.33g-p | 0.12g  | True-Serrate-Big    | Green        |
| 36 | PI 414198  | B 49930      | US/Maryland           | 2.88g | 35.79g-q | 32.86a-l | 34.46d-r | 8.99e-q  | 60.92r-u | 87.95a-d  | 42.34b-g | 130.29b-h | 11.94a-e | 0.85hij | 12.79f-o | 0.08mn | True-Serrate-Big    | Green        |
| 37 | PI 207498  | 12648        | Afghanistan/Kabul     | 4.88e | 46.52bcd | 39.86a-e | 43.33a-e | 8.64h-r  | 66.92k-u | 143.67ab  | 42.17b-g | 185.84a-d | 20.40abc | 1.01g-j | 21.41bcd | 1.12B  | True-Serrate-Big    | Green        |
| 38 | PI 176646  | Reyhan       | Turkey/Tokat          | 4.88e | 37.68d-n | 35.11a-h | 36.53b-n | 8.66h-r  | 56.92y   | 78.03a-d  | 41.00b-h | 119.03b-h | 11.47a-e | 0.57hij | 12.04g-q | 0.35S  | True-Serrate-Big    | Green        |
| 39 | PI 379412  | Krupen bel   | Macedonia             | 4.88e | 35.47h-r | 35.86a-g | 35.80c-o | 8.70f-r  | 61.92q-u | 57.37bcd  | 44.47b-g | 101.84c-h | 8.27a-e  | 1.22e-j | 9.50k-v  | 0.10i  | True-Serrate-Big    | Green        |
| 40 | PI 170579  | 2263         | Turkey/İzmir          | 4.88e | 36.54e-o | 27.66b-q | 32.24f-r | 19.43a   | 88.42a   | 12.52cd   | 42.01b-g | 54.53e-h  | 1.52cde  | 5.19b-i | 6.71m-v  | 0.11h  | Entire-Small        | Green        |
| 41 | PI 172998  | Reyhan       | Turkey/Van            | 4.88e | 47.58abc | 31.26a-n | 39.56a-j | 11.60b-i | 62.42p-t | 2.88d     | 19.55e-h | 22.44gh   | 1.91cde  | 5.46b-h | 7.37m-v  | 0.28V  | True-Serrate-Medium | Purple-Green |
| 42 | PI 414194  | B 49926      | US/Maryland           | 4.88e | 47.24bcd | 32.06a-m | 39.79a-j | 11.90b-f | 63.42opr | 4.51cd    | 38.21c-h | 42.72e-h  | 0.41e    | 5.95b-g | 6.36n-v  | 0.18d  | True-Serrate-Medium | Purple-Green |

|    |            |                        |                           |        |          |          |          |          |          |           |          |           |          |         |          |       |                     |              |
|----|------------|------------------------|---------------------------|--------|----------|----------|----------|----------|----------|-----------|----------|-----------|----------|---------|----------|-------|---------------------|--------------|
| 43 | PI 414200  | B 49932                | US/Maryland               | 3.88f  | 41.68c-k | 33.66a-k | 37.81a-l | 11.00b-k | 67.42j-m | 48.48bcd  | 30.46c-h | 78.94c-h  | 6.88b-e  | 4.69b-j | 11.57g-r | 0.09k | True-Serrate-Big    | Green        |
| 44 | PI 173746  | Reyhan                 | Turkey/Malatya            | 3.88f  | 41.38c-k | 39.66a-e | 40.66a-h | 10.20c-p | 68.42i-l | 37.09bcd  | 29.15c-h | 66.24e-h  | 5.35b-e  | 4.54b-j | 9.90j-u  | 0.41P | True-Serrate-Big    | Green        |
| 45 | Ames 32314 | GE.2013-78             | Georgia                   | 4.88e  | 41.95c-k | 26.53e-r | 34.39d-r | 9.67d-q  | 67.92jkl | 84.49a-d  | 24.29c-h | 108.79c-h | 12.40a-e | 4.76b-j | 17.16b-j | 0.32T | True-Serrate-Big    | Green        |
| 46 | PI 358470  | Lokalen                | Georgia                   | 4.88e  | 31.10l-u | 19.70k-s | 25.54o-v | 9.87c-q  | 59.92tuv | 44.90bcd  | 8.66fgh  | 53.57e-h  | 6.52b-e  | 1.98b-j | 8.50l-v  | 0.12h | True-Serrate-Big    | Purple-Green |
| 47 | PI 197442  | 10126                  | Ethiopia                  | 4.88e  | 32.20k-t | 19.80j-s | 26.14n-v | 11.87b-g | 80.92bc  | 82.29a-d  | 25.41c-h | 107.70c-h | 12.17a-e | 5.01b-j | 17.18b-j | 0.83D | True-Serrate-Big    | Purple-Green |
| 48 | PI 296391  |                        | Iran                      | 3.88f  | 47.70abc | 31.60a-n | 39.79a-j | 9.17e-q  | 65.92l-o | 100.65a-d | 17.13e-h | 117.77b-h | 16.15a-e | 4.14b-j | 20.29b-f | 0.29U | True-Serrate-Big    | Green        |
| 49 | PI 263870  |                        | Greece                    | 4.88e  | 25.10s-y | 16.20o-s | 20.79s-y | 10.87b-l | 75.92de  | 63.05bcd  | 27.37c-h | 90.41c-h  | 5.21b-e  | 2.77b-j | 7.98l-v  | 0.02q | True-Serrate-Medium | Green        |
| 50 | PI 170578  | Fesligen               | Turkey/Aydın              | 5.88c  | 15.37y   | 11.68s   | 13.67y   | 12.94bc  | 81.92b   | 60.74bcd  | 42.12b-g | 102.86c-h | 11.37a-e | 6.04b-f | 17.41b-j | 0.44M | Entire-Small        | Green        |
| 51 | PI 182426  | Reyhan                 | Turkey/Maraş              | 4.88e  | 32.37k-t | 26.08e-r | 29.37j-u | 11.14b-j | 70.92ghl | 74.45a-d  | 41.92b-g | 116.36b-h | 11.56a-e | 6.21b-e | 17.77b-i | 0.44M | True-Serrate-Big    | Purple-Green |
| 52 | Ames 32310 | GE.2013-37             | Georgia                   | 4.88e  | 27.07o-v | 25.88e-r | 26.62m-v | 10.14c-p | 69.92hij | 65.4a-d   | 45.81b-f | 111.21c-h | 12.23a-e | 6.98b   | 19.21b-g | 0.20c | True-Serrate-Big    | Green        |
| 53 | PI 174284  | Reyhan                 | Turkey/Van                | 3.88f  | 36.67e-o | 27.68b-q | 32.32f-r | 10.84b-l | 67.92jkl | 43.94bcd  | 24.61c-h | 68.55d-h  | 9.50a-e  | 3.93b-j | 13.43e-n | 0.21b | True-Serrate-Medium | Green        |
| 54 | PI 358436  | Obicen bosilok         | Macedonia                 | 5.88c  | 29.36m-u | 19.98j-s | 25.76o-v | 10.73b-m | 63.42opr | 46.00bcd  | 23.92c-h | 69.92d-h  | 5.27b-e  | 1.27d-j | 21.50bcd | 0.11h | True-Serrate-Medium | Green        |
| 55 | PI 358469  | Siten                  | Macedonia                 | 4.88e  | 42.36c-j | 29.66b-o | 37.10a-m | 13.48b   | 73.42efg | 150.10ab  | 79.92ab  | 230.02ab  | 15.63a-e | 5.87b-g | 7.79l-v  | 1.71A | True-Serrate        | Green        |
| 56 | PI 652054  | Mrs. Burns Lemon Basil | US/Mexico                 | 5.88c  | 36.03f-p | 31.48a-n | 34.84d-q | 11.48b-i | 72.42fgh | 60.61bcd  | 36.71c-h | 97.31c-h  | 6.40b-e  | 1.39c-j | 11.23h-s | 0.68F | True-Serrate-Big    | Green        |
| 57 | PI 358472  | Bitolski               | Macedonia                 | 5.88c  | 26.46p-v | 23.78g-s | 26.21n-v | 10.68b-n | 74.42ef  | 63.14bcd  | 37.70c-h | 100.84c-h | 9.58a-e  | 1.65c-j | 4.45q-v  | 0.42O | True-Serrate-Big    | Green        |
| 58 | PI 601365  | Purple Ruffles         | US/Pennsylvania           | 5.88c  | 35.86g-q | 23.98g-s | 31.01g-s | 11.48b-i | 78.42cd  | 39.36bcd  | 20.80d-h | 60.16e-h  | 3.66b-e  | 0.78hij | 18.69b-h | 0.10i | Lettuce-Serrate-Big | Purple       |
| 59 | PI 358471  | Sitnolisten            | Macedonia                 | 3.88f  | 21.97uvy | 27.88b-q | 25.07p-v | 10.34b-p | 66.9k-n2 | 65.80a-d  | 35.98c-h | 101.77c-h | 13.24a-e | 5.45b-h | 6.54n-v  | 0.41P | True-Serrate-Medium | Green        |
| 60 | Bolu       | Bolu pop.              | Turkey/Bolu               | 5.92bc | 53.59ab  | 40.76a-d | 47.46a   | 11.87b-g | 67.17j-n | 120.34a-d | 29.42c-h | 149.76a-e | 17.68a-e | 5.53b-h | 16.74b-k | 0.51I | True-Serrate-Big    | Green        |
| 61 | Midnight   | Cultivar               | Turkey                    | 5.83cd | 47.84abc | 40.95abc | 44.40a-d | 11.30b-j | 68.67i-l | 94.31a-d  | 50.29b-e | 144.61a-f | 13.87a-e | 2.88b-j | 23.21b   | 0.17e | True-Serrate-Big    | Green        |
|    |            |                        | <b>Average</b>            | 5.02   | 36.17    | 28.48    | 32.33    | 10.36    | 67.79    | 70.14     | 29.87    | 100.01    | 9.93     | 3.29    | 13.22    | 0.31  |                     |              |
|    |            |                        | <b>Minimum</b>            | 2.880  | 15.370   | 11.680   | 13.670   | 5.710    | 56.920   | 2.772     | 0.500    | 14.240    | 0.410    | 0.110   | 2.040    | 0.020 |                     |              |
|    |            |                        | <b>Maximum</b>            | 8.380  | 57.070   | 44.910   | 47.460   | 20.670   | 88.420   | 188.960   | 106.350  | 250.180   | 26.130   | 12.640  | 30.930   | 1.710 |                     |              |
|    |            |                        | <b>LSD (5%)</b>           | 0.47   | 9.82     | 14.17    | 10.70    | 10.70    | 2.80     | 123.76    | 40.80    | 117.46    | 18.89    | 52.16   | 19.48    | 0.005 |                     |              |
|    |            |                        | <b>CV %</b>               | 3.47   | 8.46     | 15.15    | 10.18    | 10.18    | 1.80     | 50.37     | 44.72    | 34.86     | 52.31    | 5.02    | 42.59    | 1.78  |                     |              |
|    |            |                        | <b>Standart deviation</b> | 0.857  | 8.929    | 7.987    | 7.720    | 2.516    | 6.101    | 41.042    | 18.088   | 47.212    | 6.301    | 2.335   | 6.913    | 0.292 |                     |              |

362 GD: Germination day, FHPH: First Harvest Plant Height, SHPH: Second Harvest Plant Height, APH: Average Plant Height, NB: Number of Branch, DFT: Days to Flowerinf Time, FHW 1: Fresh Herb Weight 1, FHW  
363 2: Fresh Herb Weight 2, TFHW: Total Fresh Herb Weight, DHW 1: Dry Herb Weight 1, DHW 2: Dry Herb Weight 2, THDW: Total Dry Herb Weight, EO: Essential Oil.  
364

365

366

367

368

369

370

371

372

373

374

375

376

377

378

379

380

381

382

383

384

385

386

387

388

| No | Genotypes   | Plant name     | Country              | GD (days) | FHPH (cm) | SHPH (cm) | APH (cm) | FHNB (no/plant) | SHNB (no/plant) | ANB (no/plant) | DFT (day) | FHW 1 (g/plant) | FHW 2 (g/plant) | TFHW (g/plant) | DHW 1 (g/plant) | DHW 2 (g/plant) | TDHW (g/plant) | EO (%)  |
|----|-------------|----------------|----------------------|-----------|-----------|-----------|----------|-----------------|-----------------|----------------|-----------|-----------------|-----------------|----------------|-----------------|-----------------|----------------|---------|
| 1  | Ames 32311  | GE.2013-43     | Georgia              | 24fg      | 53.93c-g  | 37.20c-k  | 45.57a-k | 9.80a-h         | 10.13e-n        | 9.96c-q        | 81cd      | 34.49f-m        | 18.05g-o        | 52.54e-r       | 3.60n-u         | 2.25f-k         | 5.85o-t        | 0.32h-m |
| 2  | Ames 29184  | GSMO 2-19      | Georgia/South Osetya | 24fg      | 50.34d-k  | 38.30c-j  | 44.32a-l | 11.60a-g        | 10.10e-n        | 10.85b-m       | 83bcd     | 43.45c-l        | 23.51f-j        | 66.96c-m       | 5.55k-s         | 3.11e-h         | 8.66l-o        | 0.30i-m |
| 3  | Ames 32309  | GE.2013-21     | Georgia              | 33b-g     | 45.00g-n  | 29.00e-l  | 37.00f-p | 7.80c-h         | 7.00k-q         | 7.40m-r        | 87bcd     | 25.44h-m        | 6.87q-u         | 32.31k-r       | 5.92i-q         | 0.61l-p         | 6.53n-s        | 1.07a   |
| 4  | Ames 32310  | GE.2013-37     | Georgia              | 25efg     | 52.39d-i  | 35.10c-k  | 43.75a-l | 8.10c-h         | 8.10j-p         | 8.10j-r        | 82bcd     | 37.6e-m         | 17.28h-p        | 54.89e-q       | 6.62i-o         | 4.72bcd         | 11.34i-l       | 0.14k-m |
| 5  | Ames 32312  | GE.2013-50     | Georgia              | 48ab      | 58.75bcd  | 46.00b-e  | 52.38a-f | 9.75a-h         | 5.00pq          | 7.38m-r        | 94abc     | 18.97j-m        | 17.28h-p        | 36.25j-r       | 3.58n-u         | 2.08f-l         | 5.66o-u        | 0.67b-h |
| 6  | Ames 32314  | GE.2013-78     | Georgia              | 27c-g     | 45.30f-n  | 52.70abc  | 49.00a-h | 10.30a-h        | 7.80j-p         | 9.05e-r        | 82bcd     | 25.44h-m        | 18.82g-n        | 44.26g-r       | 2.09p-u         | 1.04j-p         | 3.13t-z        | 0.70b-g |
| 7  | Bolu pop.   | Local genotype | Turkey/Bolu          | 24fg      | 63.76abc  | 45.50b-f  | 54.63a-d | 7.20fgh         | 7.20k-q         | 7.20n-r        | 90abcd    | 70.88b-f        | 35.89cd         | 106.76bc       | 11.11d-g        | 4.74bc          | 15.85def       | 0.29i-m |
| 8  | Dino        | Çeşit          | Turkey               | 25fg      | 40.80k-p  | 30.12d-l  | 35.46h-p | 6.66gh          | 6.64m-q         | 6.65pqr        | 97abc     | 46.59c-l        | 13.61j-s        | 60.2d-o        | 3.53n-u         | 1.11j-p         | 6.64n-s        | 0.68b-h |
| 9  | Large sweet | Çeşit          | Turkey               | 27c-g     | 37.00n-r  | 16.10l    | 26.55n-q | 9.00b-h         | 3.28q           | 6.14r          | 93abcd    | 10.21k-m        | 6.81q-u         | 17.02o-r       | 1.57stu         | 0.68l-p         | 2.25vyz        | 0.98a-b |
| 10 | Midnight    | Çeşit          | Turkey               | 41a-f     | 51.40d-j  | 29.33e-l  | 40.37c-p | 8.15c-h         | 6.12n-q         | 7.13n-r        | 97.4abc   | 47.25c-k        | 4.68r-u         | 51.93e-r       | 5.57j-s         | 1.67g-p         | 7.24n-q        | 0.56c-i |
| 11 | Moonlight   | Çeşit          | Turkey               | 41a-f     | 29.12rs   | 20.75jkl  | 24.94pq  | 7.45e-h         | 5.94opq         | 6.69o-r        | 101.6ab   | 39.93c-m        | 10.34m-u        | 50.27e-r       | 13.62cde        | 2.38f-k         | 16c-f          | 0.40g-m |
| 12 | PI 141198   | B 49930        | USA/Maryland         | 33b-g     | 42.00i-p  | 27.71g-l  | 34.86h-p | 12.00a-f        | 8.14j-p         | 10.07b-p       | 110a      | 38.47d-m        | 9.04n-u         | 47.51f-r       | 5.93j-q         | 1.31i-p         | 7.24n-q        | 0.77a-f |
| 13 | PI 170578   | Fesligen       | Turkey/Aydın         | 24fg      | 68.10ab   | 44.60b-g  | 56.35ab  | 10.60a-h        | 6.10n-q         | 8.35i-r        | 91abcd    | 59.64b-l        | 19.31g-m        | 78.94c-j       | 9.69e-i         | 2.44f-j         | 12.13ijk       | 0.55d-i |
| 14 | PI 172996   | Reyhan         | Turkey/Kars          | 33b-g     | 54.50c-g  | 36.80c-k  | 45.65a-k | 7.10fgh         | 5.90opq         | 6.50qr         | 84bcd     | 32.00g-m        | 27.82d-g        | 59.82d-o       | 4.54n-t         | 3.32c-f         | 7.86m-p        | 0.98a-b |
| 15 | PI 172997   | Reyhan         | Turkey/Kars          | 42a-e     | 71.67a    | 36.67c-k  | 54.17a-e | 10.00a-h        | 15.33bc         | 12.67a-d       | 83bcd     | 239.64a         | 34.47cde        | 274.11a        | 22.91a          | 4.58b-e         | 27.49a         | 0.33h-m |
| 16 | PI 173746   | Reyhan         | Turkey/Malatya       | 49ab      | 18.00t    | 20.00kl   | 19.00q   | 8.00c-h         | 9.00h-p         | 8.50g-r        | 90abcd    | 5.57m           | 4.16stu         | 9.73r          | 1.03tu          | 0.51m-p         | 1.54yz         | 0.83a-e |
| 17 | PI 174284   | Reyhan         | Turkey/Van           | 28c-g     | 46.24e-n  | 32.90d-l  | 39.57d-p | 6.70gh          | 12.30c-i        | 9.50c-r        | 85bcd     | 41.72c-m        | 34.37cde        | 76.09c-k       | 5.10l-s         | 2.04f-m         | 7.14n-q        |         |
| 18 | PI 176646   | Reyhan         | Turkey/Tokat         | 48ab      | 58.00bcd  | 39.10c-i  | 48.55a-h | 6.00h           | 9.40g-o         | 7.70k-r        | 90abcd    | 10.39klm        | 2.78tu          | 13.17q-r       | 2.02q-u         | 0.27p           | 2.29vyz        | 0.95a-b |
| 19 | PI 182426   | Reyhan         | Turkey/Maraş         | 43a-d     | 41.17j-p  | 28.00f-l  | 34.58h-p | 12.67a-d        | 7.75j-p         | 10.21b-o       | 89bcd     | 21.86j-m        | 7.03q-u         | 28.89l-r       | 5.10l-s         | 0.89j-p         | 5.99n-t        | 0.39g-m |
| 20 | PI 190100   | 1              | Iran                 | 48ab      | 63.50abc  | 47.00bcd  | 55.25abc | 10.00a-h        | 7.00k-q         | 8.50g-r        | 96abc     | 30.24g-m        | 6.79q-u         | 37.03j-r       | 16.95bc         | 2.14f-l         | 19.09bc        |         |
| 21 | PI 197442   | 10126          | Ethiopia             | 25efg     | 46.40e-n  | 33.40d-l  | 39.90c-p | 14.90a          | 10.83d-k        | 12.87a-d       | 82bcd     | 45.53c-l        | 42.23bc         | 87.77c-g       | 7.00h-o         | 2.09f-l         | 9.09k-n        | 0.27i-m |
| 22 | PI 207498   | 12648          | Afganistan/Kabil     | 29c-g     | 55.00c-g  | 32.33d-l  | 43.67a-l | 11.50a-g        | 11.40c-j        | 11.45b-j       | 89bcd     | 42.49c-m        | 19.54g-m        | 62.03d-n       | 6.85i-o         | 1.86f-o         | 8.71l-o        | 0.57c-i |
| 23 | PI 211586   | 12832          | Afganistan/ Kondoz   | 29c-g     | 53.85c-g  | 32.30d-l  | 43.08a-m | 13.50ab         | 8.90h-p         | 11.20b-k       | 81cd      | 60.99b-h        | 32.54c-f        | 93.52b-e       | 9.14f-l         | 1.68g-p         | 10.82j-m       | 0.55d-j |
| 24 | PI 253157   | Rayhoon        | Iran/Esfahan         | 24fg      | 71.90a    | 40.80c-h  | 56.35ab  | 9.20b-h         | 7.60j-p         | 8.40i-r        | 90abcd    | 75.17bcd        | 26.02d-h        | 101.19bcd      | 12.11def        | 3.14e-h         | 15.25d-h       |         |
| 25 | PI 296390   |                | Iran                 | 23g       | 37.20m-r  | 64.90a    | 58.10a   | 8.80b-h         | 10.75d-l        | 9.78c-q        | 73d       | 34.34f-m        | 46.98ab         | 81.32c-l       | 4.39n-t         | 8.33a           | 12.72g-j       | 0.13l-m |
| 26 | PI 296391   |                | Iran                 | 23g       | 56.10cde  | 60.10ab   | 51.05a-g | 12.40a-e        | 7.90j-p         | 10.15b-p       | 85bcd     | 35.01f-m        | 54.41a          | 89.42c-f       | 4.24n-t         | 8.20a           | 12.44hij       | 0.92a-c |
| 27 | PI 358464   | Edrolisten     | Macedonia            | 42a-e     | 55.67c-f  | 38.00c-j  | 46.83a-i | 8.67b-h         | 9.00h-p         | 8.83g-r        | 91abcd    | 32.27g-m        | 19.78g-m        | 52.05e-r       | 6.12i-p         | 1.30i-p         | 7.42n-q        |         |
| 28 | PI 358466   | Krsaten        | Macedonia            | 34b-g     | 50.10d-k  | 33.00d-l  | 41.55b-n | 11.56a-g        | 9.50f-o         | 10.53b-n       | 87bcd     | 88.55b          | 46.24ab         | 134.78b        | 17.98b          | 3.41c-f         | 21.39b         | 0.88a-d |
| 29 | PI 358468   | Krupnolisten   | Macedonia            | 27c-g     | 29.10rs   | 26.14h-l  | 27.62m-q | 9.90a-h         | 9.86f-o         | 9.88c-q        | 83bcd     | 13.78j-m        | 24.33e-l        | 38.11l-r       | 0.79tu          | 2.78f-i         | 3.57s-z        | 0.33h-m |
| 30 | PI 358469   | Siten          | Macedonia            | 26defg    | 39.60l-q  | 23.70h-l  | 31.65i-q | 9.30b-h         | 8.50i-p         | 8.90f-r        | 89bcd     | 20.19j-m        | 6.83q-u         | 27.02m-r       | 5.32l-s         | 1.04j-p         | 6.36n-s        | 0.46f-l |
| 31 | PI 358471   | Sitnolisten    | Macedonia            | 32b-g     | 25.33st   | 24.50h-l  | 24.92pq  | 9.67b-h         | 7.50j-p         | 8.58g-r        | 92abcd    | 13.95j-m        | 5.3q-u          | 19.25n-r       | 4.08n-t         | 0.67l-p         | 4.75p-v        | 0.88a-d |
| 32 | PI 358472   | Bitolski       | Macedonia            | 53a       | 34.00o-s  | 27.50g-l  | 30.75j-q | 13.50ab         | 13.50c-f        | 13.50ab        | 98abc     | 73.68b-e        | 18.98g-n        | 92.66b-e       | 14.14bcd        | 3.17d-g         | 17.31cd        | 0.67b-h |
| 33 | PI 368695   | Zelen          | Macedonia            | 32b-g     | 55.70c-f  | 28.00f-l  | 41.85b-n | 10.40a-h        | 15.20bc         | 12.80a-d       | 83bcd     | 49.59c-j        | 12.03l-u        | 61.62d-n       | 9.56e-k         | 1.46i-p         | 11.02jkl       | 0.38g-m |
| 34 | PI 368697   | Vladimirska    | Macedonia            | 24fg      | 47.50e-m  | 34.70d-k  | 41.10b-o | 12.40a-e        | 12.60c-h        | 12.50a-e       | 73d       | 30.10g-m        | 22.49f-k        | 52.59e-r       | 9.61e-k         | 4.72bcd         | 14.33d-i       |         |
| 35 | PI 368699   | Edar           | Macedonia            | 34b-g     | 30.08qrs  | 21.80i-l  | 25.94opq | 12.83abc        | 7.40j-p         | 10.12b-p       | 89bcd     | 26.62h-m        | 6.93q-u         | 33.55k-r       | 4.64m-t         | 0.87k-p         | 5.51p-u        | 0.37g-m |
| 36 | PI 368700   | Edar           | Macedonia            | 53a       | 34.00o-s  | 32.00d-l  | 33.00i-q | 10.00a-h        | 8.90h-p         | 9.45d-r        | 95abc     | 36.20f-m        | 21.06g-l        | 57.26e-p       | 5.62j-s         | 2.08f-l         | 7.7m-p         |         |
| 37 | PI 379412   | Krupen bel     | Macedonia            | 35b-g     | 58.03bcd  | 34.60d-k  | 46.31a-i | 9.57b-h         | 12.40c-i        | 10.99b-l       | 81cd      | 70.10b-f        | 14.82l-r        | 84.92c-g       | 11.73def        | 4.52b-e         | 16.25c-e       | 0.56c-i |
| 38 | PI 379414   | Bel kripten    | Macedonia            | 44abc     | 56.00cde  | 30.00d-l  | 43.00a-m | 10.00a-h        | 14.80bcd        | 12.40b-f       | 86bcd     | 9.68lm          | 3.26tu          | 12.94qr        | 1.81r-u         | 0.39op          | 2.2vyz         | 0.04m-m |
| 39 | PI 414193   | B 49939        | USA/Maryland         | 33b-g     | 32.14p-s  | 27.78g-l  | 29.96l-q | 10.20a-h        | 6.70l-q         | 8.45h-r        | 88bcd     | 23.02i-m        | 11.7l-u         | 34.72k-r       | 3.39o-u         | 0.92j-p         | 4.31q-y        | 0.42f-l |
| 40 | PI 414194   | B 49926        | USA/Maryland         | 47ab      | 51.00d-k  | 22.00i-l  | 36.50g-p | 10.00a-h        | 14.00cde        | 12.00b-g       | 82bcd     | 11.69klm        | 2.58u           | 14.27pqr       | 0.93tu          | 0.34op          | 1.27yz         |         |
| 41 | PI 414195   | B 19927        | USA/Maryland         | 40a-g     | 52.50d-h  | 39.00c-i  | 45.75a-k | 10.40a-h        | 13.50c-f        | 11.95b-h       | 81cd      | 25.38h-m        | 7.61p-u         | 32.99k-r       | 3.06o-u         | 0.86k-p         | 3.92r-z        | 0.52e-j |
| 42 | PI 414196   | B 49928        | USA/Maryland         | 25efg     | 28.00rst  | 25.67h-l  | 26.83n-q | 8.50b-h         | 13.33c-g        | 10.92b-l       | 87bcd     | 22.81m-p        | 10.77m-u        | 33.58k-r       | 5.74r           | 1.59h-p         | 3.92r-z        | 0.23i-m |
| 43 | PI 414197   | B 49929        | USA/Maryland         | 23g       | 52.70d-h  | 39.10c-i  | 45.90a-j | 12.10a-f        | 9.40g-o         | 10.75b-m       | 73d       | 61.62b-h        | 40.21bc         | 101.83bcd      | 9.64e-j         | 6.07b           | 15.71d-g       | 0.3i-m  |

389 Table 4. Morphological traits of basil genotypes in 2018.

390

|    |           |                           |                  |       |          |          |          |          |          |          |        |          |          |          |          |         |          |         |
|----|-----------|---------------------------|------------------|-------|----------|----------|----------|----------|----------|----------|--------|----------|----------|----------|----------|---------|----------|---------|
| 44 | PI 414199 | B 49931                   | USA/Maryland     | 32b-g | 49.60d-l | 28.71e-l | 39.16e-p | 9.80a-h  | 10.40e-m | 10.10b-p | 83bcd  | 76.46bc  | 15.32l-q | 91.78b-e | 11.01d-h | 1.97f-n | 12.98f-j | 0.22i-m |
| 45 | PI 414200 | B 49932                   | USA/Maryland     | 48ab  | 54.00c-g | 38.00c-j | 46.00a-j | 12.00a-f | 20.00a   | 16.00a   | 82bcd  | 12.21klm | 5.17q-u  | 17.39o-r | 2.13p-u  | 0.45nop | 2.58uz   | 0.23i-m |
| 46 | PI 531396 | 1420                      | Hungary          | 32b-g | 64.00abc | 45.00b-g | 54.50a-e | 8.00c-h  | 9.00h-p  | 8.50g-r  | 87bcd  | 15.77j-m | 4.61r-u  | 20.39n-r | 0.08u    | 0.92j-p | 1.00z    |         |
| 47 | PI 652054 | Mrs. Burns<br>Lemon Basil | USA/Mexico       | 44abc | 43.00h-o | 31.75d-l | 37.38f-p | 7.33e-h  | 18.67ab  | 13.00abc | 88bcd  | 26.33h-m | 12.97k-t | 39.3h-r  | 5.11l-s  | 1.67g-p | 6.78n-r  | 0.35g-m |
| 48 | PI 652065 | Genovese                  | Italia/Veneto    | 29c-g | 45.00g-n | 38.00c-j | 41.50b-n | 7.60d-h  | 7.60j-p  | 7.60l-r  | 88bcd  | 39.42c-m | 7.97o-u  | 47.39f-r | 5.42l-s  | 0.65l-p | 6.07n-t  | 0.48e-k |
| 49 | PI 652070 | Sweet basil               | USA/Pennsylvania | 35c-g | 58.60bcd | 38.57c-i | 48.59a-h | 12.10a-f | 7.00k-q  | 9.55c-r  | 81cd   | 64.71b-g | 17.52h-p | 82.22c-h | 8.68f-m  | 2.41f-k | 11.09jkl | 0.2j-m  |
| 50 | PI 652071 | Dark Opal                 | USA/California   | 26d-g | 34.10o-s | 26.50h-l | 30.30k-q | 10.60a-h | 12.80c-h | 11.70b-i | 93a-d  | 39.10d-m | 32.33c-f | 71.43c-l | 7.53g-n  | 5.65b   | 13.18e-j | 0.67b-h |
|    |           | <b>Average</b>            |                  | 34.00 | 47.82    | 34.21    | 41.02    | 9.91     | 9.74     | 9.83     | 87.32  | 41.13    | 18.23    | 59.36    | 6.68     | 2.38    | 9.06     | 0.51    |
|    |           | <b>Minimum</b>            |                  | 23.00 | 18.00    | 16.10    | 19.00    | 6.00     | 3.28     | 6.14     | 73.00  | 5.57     | 2.58     | 9.73     | 0.08     | 0.27    | 1.00     | 0.04    |
|    |           | <b>Maximum</b>            |                  | 53.00 | 71.90    | 64.90    | 58.10    | 14.90    | 20.00    | 16.00    | 110.00 | 239.64   | 54.41    | 274.11   | 22.91    | 8.33    | 27.49    | 1.07    |
|    |           | <b>LSD (5%)</b>           |                  | 17.10 | 16.08    | 17.63    | 15.47    | 5.20     | 4.07     | 3.51     | 20.07  | 37.30    | 10.21    | 43.89    | 4.07     | 1.56    | 3.12     | 0.36    |
|    |           | <b>CV (%)</b>             |                  | 23.56 | 18.61    | 33.54    | 22.26    | 30.48    | 33.95    | 24.20    | 9.46   | 47.48    | 52.79    | 44.82    | 30.71    | 48.97   | 48.97    | 24.85   |
|    |           | <b>Standart deviation</b> |                  | 8.66  | 12.11    | 9.98     | 9.67     | 2.09     | 3.59     | 2.23     | 7.06   | 37.40    | 13.54    | 44.83    | 4.60     | 2.00    | 5.61     | 0.27    |

391 GD: Germination day, FHPH: First Harvest Plant Height, SHPH: Second Harvest Plant Height, APH: Average Plant Height, FHNB: First Harvest Number of Branch, SHNB: Second Harvest Number of Branch, ANB:  
392 Average Number of Branch, DFT: Days to Flowerinf Time, FHW 1: Fresh Herb Weight 1, FHW 2: Fresh Herb Weight 2, TFHW: Total Fresh Herb Weight, DHW 1: Dry Herb Weight 1, DHW 2: Dry Herb Weight 2,  
393 THDW: Total Dry Herb Weight, EO: Essential Oil

394

395

396



### 397 **3.5. Correlation analysis and principal component analysis**

398 Correlation analysis assists in selecting the effective properties in order to an indirect selection  
399 of superior genotypes. In addition to this, principal component analysis is an appropriate  
400 multivariate technique to identify and assessment of independent principle components  
401 depending on influential plant characteristics. These two analysis methods contribute to the  
402 plant breeding program to help breeders [68,69].

#### 403 **3.5.1. Correlation analysis of basil genotypes**

404 The assessment of correlation analysis values among the all examined properties for 2017 and  
405 2018 years were shown in table 5 and table 6. This analysis was conducted to determine the  
406 relationship among the examined properties in 2017 and 2018 years. There was found 27  
407 positives and one negative correlations totally which out of the 17 highly significant and  
408 positive correlations were observed between  $r=0.328-0.926$ , 8 positive correlations were seen  
409 between  $r=0.273-0.320$  and only one negative correlation was found between GD and FHW 2  
410 with  $r=-0.325$  in the 2017 year (Table 5). The highest positive correlation was noted between  
411 the PHPH and APH with  $r=0.926$ . Other high positive correlations were found between the  
412 FHPH and SHPH, FHW 1, TFHW and TDHW. Similarly, SHPH had positive correlation with  
413 APH. APH had recorded positive correlated with FHW 1 and TFHW. NB had only one  
414 correlation with DFT ( $r=0.547$ ). FHW 1 correlated with TFHW, DHW and TDHW. FHW2  
415 correlated with TFHW, DHW 2 and TFHW correlated with DHW 1, TDHW and EO. DHW1  
416 had only one correlation with TDHW ( $r=0.822$ ). Positive correlations also were obtained  
417 between the FHPH and DHW 1, and SHPH was found positive correlation with FHW1 and  
418 TFHW. DFT was found correlation with DHW 2. FHW 1 and FHW 2 had correlation with EO  
419 and DHW2 correlated with TDHW ( $r=0.274$ ). EO of basil genotypes was correlated only fresh  
420 weight among the examined properties and most of correlations were found in yield properties  
421 fresh and dry weight in 2017 year.

422 Forty-three correlations were found among the 15 examined properties in fifty basil  
423 genotypes as positive and negative in 2018 year. 26 high significant positive, 4 high significant  
424 negative, 7 positive and 6 negative correlations were obtained in correlation analysis of 2018  
425 year. According to GD headings, data had a highly significant negative correlation with FHW  
426 2 ( $r=-0.463$ ) and DHW2 ( $r=-0.411$ ) and positive correlation with DFT ( $r=0.354$ ). Concerning  
427 to FHPH, data showed highly significant positive correlation with SHPH, APH, FHW 1 and  
428 TFHW with  $r=0.548$ ,  $0.886$ ,  $0.428$ ,  $0.414$ , respectively. It also gave positive correlation with  
429 DHW ( $r=0.345$ ) and TDHW ( $r=0.341$ ). As for SHPH, it showed highly significant positive  
430 correlation coefficient with APH ( $r=0.855$ ), FHW 2 ( $r=0.498$ ) and DHW 2 ( $r=0.537$ ) while  
431 recorded negative correlation with DFT ( $r=0.341$ ). Regarding APH, it showed a correlation  
432 with DFT ( $r=-0.337$ ) as negatively and FHW 1 ( $r=0.335$ ) and TDHW ( $r=0.332$ ) as positively.  
433 Moreover, it gave highly significant positive correlation with FHW 2 ( $r=0.365$ ), TFHW  
434 ( $r=0.389$ ) and DHW 2 ( $r=0.383$ ). FNB had one highly significant positive correlation with ANB  
435 ( $r=0.61$ ) and one positive correlation with FHW2 with  $r=0.282$ . Although SNB showed a  
436 negative correlation with DFT and EO with  $r=-0.361$  and  $r=-0.339$ , respectively, it had highly  
437 significant positive correlation with ANB ( $r=0.883$ ). ANB had highly significant negative  
438 correlation with DFT ( $r=-0.382$ ) and negative correlation with EO ( $r=-0.302$ ). DFT had highly  
439 significant negative correlation with FHW 2 ( $r=-0.367$ ) and negative correlation with DHW2  
440 ( $r=-0.352$ ). It also showed positive correlation coefficient with EO ( $r=0.3$ ). Highly significant  
441 positive correlations were obtained for FHW 1 with FHW 2, TFHW, DHW 1, DHW 2 and  
442 TDHW with  $r=0.44$ ,  $0.961$ ,  $0.801$ ,  $0.378$  and  $0.791$ , respectively. FHW 2 had highly significant  
443 positive correlation with other yield values as TFHW ( $r=0.671$ ), DHW 1 ( $r=0.369$ ), DHW 2  
444 ( $r=0.798$ ) and TDHW ( $r=0.57$ ). TFHW showed highly significant and positive correlation with  
445 DHW 1, DHW 2 and TDHW with  $r=0.775$ ,  $0.558$  and  $0.828$ , respectively. DHW 1 had highly

446 significant positive correlation with DHW2 ( $r=0.382$ ) and TDHW ( $r=0.951$ ). At the same time,

447 DHW 2 was also recorded as highly significant positive correlation with TDHW ( $r=0.646$ ).

448

449

450

451

452 **Table 5. Correlation analysis among the examined properties of basil genotypes in 2017.**

|                                | GD (days) | FHPH (cm) | SHPH (cm) | APH (cm) | NB (no plant <sup>-1</sup> ) | DFT (days) | FHW 1 (g plant <sup>-1</sup> ) | FHW 2 (g plant <sup>-1</sup> ) | TFHW (g plant <sup>-1</sup> ) | DHW 1 (g plant <sup>-1</sup> ) | DHW 2 (g plant <sup>-1</sup> ) | TDHW (g plant <sup>-1</sup> ) | EO (%)  |
|--------------------------------|-----------|-----------|-----------|----------|------------------------------|------------|--------------------------------|--------------------------------|-------------------------------|--------------------------------|--------------------------------|-------------------------------|---------|
| GD (days)                      | 1         | -0.045    | -0.116    | -0.13    | 0.178                        | 0.224      | 0.101                          | -0.325*                        | -0.037                        | 0.143                          | -0.193                         | 0.17                          | 0.075   |
| FHPH (cm)                      | -0.045    | 1         | 0.703**   | 0.926**  | 0.126                        | -0.128     | 0.368**                        | 0.123                          | 0.367**                       | 0.32*                          | 0.097                          | 0.328**                       | 0.008   |
| SHPH (cm)                      | -0.116    | 0.703**   | 1         | 0.91**   | 0.068                        | -0.116     | 0.285*                         | 0.176                          | 0.315*                        | 0.234                          | 0.128                          | 0.209                         | 0.049   |
| APH (cm)                       | -0.13     | 0.926**   | 0.91**    | 1        | 0.083                        | -0.138     | 0.348**                        | 0.2                            | 0.379**                       | 0.274*                         | 0.139                          | 0.277*                        | 0.051   |
| NB (no plant <sup>-1</sup> )   | 0.178     | 0.126     | 0.068     | 0.083    | 1                            | 0.547**    | -0.019                         | 0.01                           | -0.013                        | 0.045                          | 0.167                          | 0.076                         | 0.063   |
| DFT (days)                     | 0.224     | -0.128    | -0.116    | -0.138   | 0.547**                      | 1          | -0.076                         | 0.188                          | 0.006                         | -0.06                          | 0.293*                         | 0.044                         | 0.148   |
| FHW 1 (g plant <sup>-1</sup> ) | 0.101     | 0.368**   | 0.285*    | 0.348**  | -0.019                       | -0.076     | 1                              | 0.146                          | 0.925**                       | 0.888**                        | 0.012                          | 0.696**                       | 0.312*  |
| FHW 2 (g plant <sup>-1</sup> ) | -0.325*   | 0.123     | 0.176     | 0.2      | 0.01                         | 0.188      | 0.146                          | 1                              | 0.51**                        | 0.069                          | 0.617**                        | 0.155                         | 0.273*  |
| TFHW (g plant <sup>-1</sup> )  | -0.037    | 0.367**   | 0.315*    | 0.379**  | -0.013                       | 0.006      | 0.925**                        | 0.51**                         | 1                             | 0.799**                        | 0.246                          | 0.665**                       | 0.376** |
| DHW 1 (g plant <sup>-1</sup> ) | 0.143     | 0.32*     | 0.234     | 0.274*   | 0.045                        | -0.06      | 0.888**                        | 0.069                          | 0.799**                       | 1                              | 0.089                          | 0.822**                       | 0.244   |
| DHW 2 (g plant <sup>-1</sup> ) | -0.193    | 0.097     | 0.128     | 0.139    | 0.167                        | 0.293*     | 0.012                          | 0.617**                        | 0.246                         | 0.089                          | 1                              | 0.274*                        | 0.155   |
| TDHW (g plant <sup>-1</sup> )  | 0.17      | 0.328**   | 0.209     | 0.277*   | 0.076                        | 0.044      | 0.696**                        | 0.155                          | 0.665**                       | 0.822**                        | 0.274*                         | 1                             | 0.043   |
| EO (%)                         | 0.075     | 0.008     | 0.049     | 0.051    | 0.063                        | 0.148      | 0.312*                         | 0.273*                         | 0.376**                       | 0.244                          | 0.155                          | 0.043                         | 1       |

453 \*5%, \*\*1%; GD: Germination day, FHPH: First Harvest Plant Height, SHPH: Second Harvest Plant Height, APH: Average Plant Height, NB: Number of Branch, DFT: Days to  
 454 Flowerinf Time, FHW 1: Fresh Herb Weight 1, FHW 2: Fresh Herb Weight 2, TFHW: Total Fresh Herb Weight, DHW 1: Dry Herb Weight 1, DHW 2: Dry Herb Weight 2, THDW:  
 455 Total Dry Herb Weight, EO: Essential Oil

456 **Table 6. Correlation analysis among the examined properties of basil genotypes in 2018.**

|                                | GD (days) | FHPH (cm) | SHPH (cm) | APH (cm) | FNB (no plant <sup>-1</sup> ) | SNB (no plant <sup>-1</sup> ) | ANB (no plant <sup>-1</sup> ) | DFT (day) | FHW 1 (g plant <sup>-1</sup> ) | FHW 2 (g plant <sup>-1</sup> ) | TFHW (g plant <sup>-1</sup> ) | DHW 1 (g plant <sup>-1</sup> ) | DHW 2 (g plant <sup>-1</sup> ) | TDHW (g plant <sup>-1</sup> ) | EO (%)  |
|--------------------------------|-----------|-----------|-----------|----------|-------------------------------|-------------------------------|-------------------------------|-----------|--------------------------------|--------------------------------|-------------------------------|--------------------------------|--------------------------------|-------------------------------|---------|
| GD (days)                      | 1         | -0.053    | -0.211    | -0.139   | -0.047                        | 0.237                         | 0.168                         | 0.354*    | -0.05                          | -0.463**                       | -0.184                        | 0.033                          | -0.411**                       | -0.116                        | -0.019  |
| FHPH (cm)                      | -0.053    | 1         | 0.548**   | 0.886**  | 0.011                         | 0.066                         | 0.058                         | -0.223    | 0.428**                        | 0.197                          | 0.414**                       | 0.345*                         | 0.179                          | 0.341*                        | -0.234  |
| SHPH (cm)                      | -0.211    | 0.548**   | 1         | 0.855**  | 0.008                         | -0.05                         | -0.036                        | -0.341*   | 0.126                          | 0.498**                        | 0.258                         | 0.065                          | 0.537**                        | 0.23                          | -0.142  |
| APH (cm)                       | -0.139    | 0.886**   | 0.855**   | 1        | -0.015                        | 0.029                         | 0.016                         | -0.337*   | 0.335*                         | 0.365**                        | 0.389**                       | 0.252                          | 0.383**                        | 0.332*                        | -0.257  |
| FNB (no plant <sup>-1</sup> )  | -0.047    | 0.011     | 0.008     | -0.015   | 1                             | 0.167                         | 0.61**                        | -0.193    | 0.14                           | 0.282*                         | 0.202                         | 0.204                          | 0.156                          | 0.209                         | -0.061  |
| SNB (no plant <sup>-1</sup> )  | 0.237     | 0.066     | -0.05     | 0.029    | 0.167                         | 1                             | 0.883**                       | -0.361*   | 0.152                          | 0.012                          | 0.129                         | 0.068                          | 0.029                          | 0.059                         | -0.339* |
| ANB (no plant <sup>-1</sup> )  | 0.168     | 0.058     | -0.036    | 0.016    | 0.61**                        | 0.883**                       | 1                             | -0.382**  | 0.189                          | 0.144                          | 0.2                           | 0.152                          | 0.097                          | 0.147                         | -0.302* |
| DFT (day)                      | 0.354*    | -0.223    | -0.341*   | -0.337*  | -0.193                        | -0.361*                       | -0.382**                      | 1         | -0.091                         | -0.367**                       | -0.189                        | 0.061                          | -0.352*                        | -0.057                        | 0.3*    |
| FHW 1 (g plant <sup>-1</sup> ) | -0.05     | 0.428**   | 0.126     | 0.335*   | 0.14                          | 0.152                         | 0.189                         | -0.091    | 1                              | 0.44**                         | 0.961**                       | 0.801**                        | 0.378**                        | 0.791**                       | -0.068  |
| FHW 2 (g plant <sup>-1</sup> ) | -0.463**  | 0.197     | 0.498**   | 0.365**  | 0.282*                        | 0.012                         | 0.144                         | -0.367**  | 0.44**                         | 1                              | 0.671**                       | 0.369**                        | 0.798**                        | 0.57**                        | -0.021  |
| TFHW (g plant <sup>-1</sup> )  | -0.184    | 0.414**   | 0.258     | 0.389**  | 0.202                         | 0.129                         | 0.2                           | -0.189    | 0.961**                        | 0.671**                        | 1                             | 0.775**                        | 0.558**                        | 0.828**                       | -0.063  |
| DHW 1 (g plant <sup>-1</sup> ) | 0.033     | 0.345*    | 0.065     | 0.252    | 0.204                         | 0.068                         | 0.152                         | 0.061     | 0.801**                        | 0.369**                        | 0.775**                       | 1                              | 0.382**                        | 0.951**                       | -0.102  |
| DHW 2 (g plant <sup>-1</sup> ) | -0.411**  | 0.179     | 0.537**   | 0.383**  | 0.156                         | 0.029                         | 0.097                         | -0.352*   | 0.378**                        | 0.798**                        | 0.558**                       | 0.382**                        | 1                              | 0.646**                       | -0.073  |
| TDHW (g plant <sup>-1</sup> )  | -0.116    | 0.341*    | 0.23      | 0.332*   | 0.209                         | 0.059                         | 0.147                         | -0.057    | 0.791**                        | 0.57**                         | 0.828**                       | 0.951**                        | 0.646**                        | 1                             | -0.103  |
| EO (%)                         | -0.019    | -0.234    | -0.142    | -0.257   | -0.061                        | -0.339*                       | -0.302*                       | 0.3*      | -0.068                         | -0.021                         | -0.063                        | -0.102                         | -0.073                         | -0.103                        | 1       |

457 \*5%, \*\*1%; GD: Germination day, FHPH: First Harvest Plant Height, SHPH: Second Harvest Plant Height, APH: Average Plant Height, FHNB: First Harvest Number of Branch,  
 458 SHNB: Second Harvest Number of Branch, ANB: Average Number of Branch, DFT: Days to Flowerinf Time, FHW 1: Fresh Herb Weight 1, FHW 2: Fresh Herb Weight 2, TFHW:  
 459 Total Fresh Herb Weight, DHW 1: Dry Herb Weight 1, DHW 2: Dry Herb Weight 2, THDW: Total Dry Herb Weight, EO: Essential Oil



475

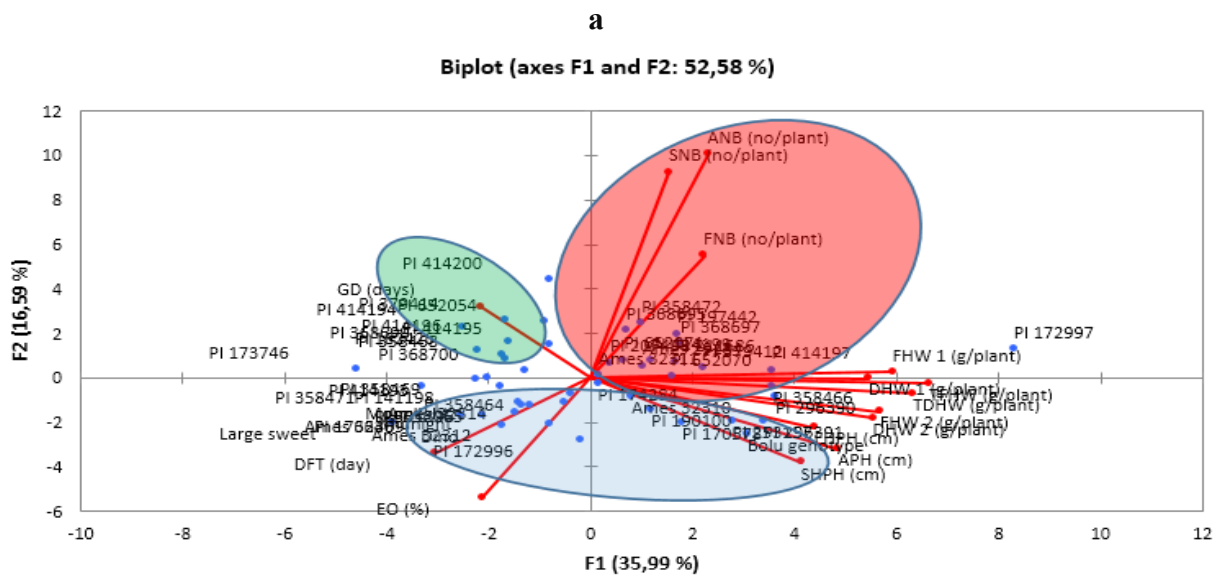

476

477

478

**Figure 1. PCA analysis of basil genotypes in 2017 (a) and 2018 (b).**

### 479 3.5.3. Genetic diversity of basil genotypes

480 It was reported that plant properties depending on UPOV descriptor are highly heritable and

481 reliable for the first classification of genotypes into different morphotypes. Morphological

482 markers ensure a simple and cheap method for routine screening of many of genotypes to

483 identify morphotypes and manage the germplasm collection of plants [16]. For this reason, a

484 hierarchical cluster analysis (HCA) was performed to get the best classification depending on

485 leaf color and leaf shape for 2017 and UPOV criteria by using the 2018 data. We selected the

486 agglomeration method by using the Ward method for 2018. Constellation plot provided the best

487 results to discrimination of genetic diversity among the basil cultivars and genotypes (figure

488 2a, b). The constellation plot showed the genetic diversity among the 61 basil genotypes in 2017

489 (figure 2a). This plot was divided two main groups as A and B. These main groups also divided

490 two sub-groups as A1, A2, B1 and B2. The most of the basil genotypes (49 genotypes) located

491 in group A. The sub-group A1 had the most genotypes (26 genotypes) including Bolu genotype

492 and midnight cultivar compared to sub-group A2. Twenty-three genotypes located in sub-group

493 A2. The main group B included 12 basil genotypes and B1 sub-group had 8 basil genotypes

494 and B2 had only 4 genotypes. B group (B1 and B2 sub-groups) showed differences depending  
495 on leaf color than A group (A1 and A2). In experiment 2018 depending UPOV criteria,  
496 constellation plot had genetic differences among the 50 basil genotypes in 2018. This plot was  
497 also split the two main groups as A and B. These groups were also divided into two main  
498 subgroups as A1, A2, and B1 and B2. The first group (group A) had 17 genotypes (two cultivars  
499 and 15 basil genotypes). The subgroup A1 had two cultivars (dino and moonlight) and one  
500 genotype and subgroup A2 had 14 genotypes. The second group (group B) had 33 genotypes  
501 including two cultivars. The subgroup B1 had two basil cultivars (midnight and large sweet)  
502 and 16 genotypes and subgroup B2 had 15 basil genotypes. The constellation plot consisted of  
503 6 clusters and group A had two clusters as C1 and C2, and group B had four clusters as C3, C4,  
504 C5 and C6. Basil cultivars took place three different clusters as C1, C3 and C4. Group A2 or  
505 C2 had the highest basil genotype counts as well as group A1 or C1 had the lowest basil  
506 genotype counts (Figure 2b). 7, 11, 47 basil cultivars and genotype located in group A1 and  
507 they showed differences in terms of SH compared the other genotypes. C6 had differences  
508 based on PL and FSLI and this cluster took place in different part. It was determined that PH,  
509 LBPCS and LBSM properties had no effect to separation the genetic diversity of basil  
510 genotypes. These properties were found similar in all basil genotypes.

511 Carovic-stanko et al. [16] conducted a study on 27 morphological properties of basil  
512 genotypes. It was reported that 46 *Ocimum basilicum* genotypes were divided to 6 clusters  
513 depending on 25 morphological properties and same leaf color located different place in  
514 dendrogram analysis. Our 2017 and 2018 experimental results showed similar with previous  
515 literature.





527 differences in each year. There was found correlation between yield component and essential  
528 oil content in 2017, however in 2018, there was not correlation between these treatments. PCA  
529 had totally over than 50% in 2017 and 2018 years. The constellation plot showed genetic  
530 diversity and variation appeared depending on leaf shape and color in 2017 and UPOV criteria  
531 in 2018. The overall the results of this study was suggested that PI 652070 and PI 296391  
532 genotypes had the highest herbs yield. In addition, PI 358469 and Ames 32309 genotypes had  
533 the highest essential oil content. So, genotypes of this later group might be good parents to be  
534 used in improvement programs of basil.

535 **Author Contributions:** Conceptualization, writing-review and editing G.Y. supported by  
536 M.C.; data curation G.Y. and M.C.; resources G.Y.; methodology G.Y. All authors have read  
537 and accepted the published version of the manuscript.

## 538 **References**

- 539 1. Carovic-Stanko, K.; Liber, Z.; Besendorfer, V.; Javornik, B.; Bohanec, B.; Kolak, I.;  
540 Satovic, Z. Genetic relations among basil taxa (*Ocimum* L.) based on molecular markers,  
541 nuclear DNA content, and chromosome number. *Plant Syst. Evol.* 2010, 285(2), 13-22,  
542 doi:10.1007/s00606-009-0251-z.
- 543 2. Siddiqui, B.S.; Aslam, H.; Ali, S.T.; Begum, S.; Khatoon, N. Two new triterpenoids and  
544 a steroidal glycoside from the aerial parts of *Ocimum basilicum*. *Chemical and*  
545 *Pharmaceutical Bulletin (Tokyo)*, 2007, 55, 516-9, doi:10.1248/cpb.55.516.
- 546 3. Siddiqui, B.S.; Aslam, H.; Begum, S.; Ali, S.T. New cinnamic acid esters from *Ocimum*  
547 *basilicum*. *Natural Product Research*, 2007, 21, 736-41,  
548 doi:10.1080/14786410601083639.
- 549 4. Zheljazkov, V.D.; Callahan, A.; Cantrell, C.L. Yield and oil composition of 38 basil  
550 (*Ocimum basilicum* L.) accessions grown in Mississippi. *J. Agr. Food Chem.* 2008, 56,  
551 241-245, doi:10.1021/jf072447y.

- 552 5. Simon, J. E.; Quinn, J.; Murray, R.G. Basil: a source of essential oils. In Advances in  
553 new crops; Janick, J., Simon, J. E., Eds.; Timber Press: Portland, OR, 1990; pp 484-489.
- 554 6. Chopra, R. N., S. L. Nayar, and I. C. Chopra. 1956. Glossary of Indian medicinal plants,  
555 p 179. New Delhi: CSIR.
- 556 7. Usha Devi, C.; Neena, V.; Atul, P.K.; Pillai, C.R. Antiplasmodial effect of three  
557 medicinal plants: A preliminary study. *Current Science*, 2001, 80, 917-19.
- 558 8. Govindarajan, M.; Sivakumar, R.; Rajeswary, M.; Yogalakshmi, K. Chemical  
559 composition and larvicidal activity of essential oil from *Ocimum basilicum* (L.) against  
560 *Culex tritaeniorhynchus*, *Aedes albopictus* and *Anopheles subpictus* (Diptera:  
561 Culicidae). *Experimental Parasitology*, 2013, 134, 7-11.  
562 doi:10.1016/j.exppara.2013.01.018.
- 563 9. Ntonga, P.A.; Baldovini, N.; Mouray, E.; Mambu, L.; Belong, P.; Grellier, P. Activity of  
564 *Ocimum basilicum*, *Ocimum canum*, and *Cymbopogon citratus* essential oils against  
565 *Plasmodium falciparum* and mature-stage larvae of *Anopheles funestus* s.s. *Parasite*,  
566 2014, 21, 1-8. doi:10.1051/parasite/2014001.
- 567 10. Morales, M.R.; Charles, D.J.; Simon, J.E. New aromatic lemon basil germplasm, In: J.  
568 Janick and J.E. Simon, eds. New Crops. Wiley, New York, 1993, pp. 632-635.
- 569 11. De Masi, L.; Siviero, P.; Esposito, C.; Castaldo, D.; Siano, F.; Laratta, B. Assessment of  
570 agronomic chemical and genetic variability in common basil (*Ocimum basilicum* L.).  
571 *Eur. Food Res. Technol.*, 2006, 223, 273-281.
- 572 12. Telci, I.; Bayram, E.; Yılmaz, G.; Avcı, B. Variability in essential oil composition of  
573 Turkish basils (*Ocimum basilicum* L.). *Biochemical Systematics and Ecology*, 2006, 34,  
574 489-497. doi: <https://doi.org/10.1016/j.bse.2006.01.009>.
- 575 13. Kwee, E.M. Niemeyer, E.D. Variations in phenolic composition and antioxidant  
576 properties among 15 basil (*Ocimum basilicum* L.) cultivars. *Food Chem.*, 2011, 128,

- 577 1044-1050.
- 578 14. Javanmardi, J.; Khalighi, A.; Kashi, A.; Bais, H.P.; Vivanio, J.M. Chemical  
579 characterization of basil (*Ocimum basilicum* L.) found in local accessions and used in  
580 traditional medicines in Iran. *Journal of Agriculture and Food Chemistry*, 2002, 50,  
581 5878-5883.
- 582 15. KızıL, S.; Bayram, E., Kırıcı, S., Tansı, S., Yılmaz, G., Arabacı, O., KızıL, S., Telci İ.  
583 2010. Possibilities to increase medicinal and aromatic plants production. TMMOB, 7th  
584 Technical Congress of the Chamber of Agricultural Engineers, 11 January 2010, Ankara,  
585 Turkey.
- 586 16. Carovic-Stanko, K.; Liber, Z.; Politeo, O.; Strikic, F.; Kolak, I.; Milos, M.; Satovic, Z.  
587 Molecular and chemical characterization of the most widespread *Ocimum* species. *Plant*  
588 *Syst. Evol.*, 2011, 294, 253-262.
- 589 17. Telci, I.; Bayram, E.; Yılmaz, G.; Avcı, A.B. Morphological, agronomic and  
590 technological properties and selection of superior plants of cultivated local basil  
591 (*Ocimum* spp.) genotypes in Turkey. Result report, TOGTAG-3102 project, TÜBİTAK,  
592 2005.
- 593 18. BMGD. Bolu Meteorology General Directorate. Bolu Meteorology General Directorate.  
594 Turkish State Meteorological Service, 2019.
- 595 19. Yaldiz, G.; Camlica, M. Variation in the fruit phytochemical and mineral composition,  
596 and phenolic content and antioxidant activity of the fruit extracts of different fennel  
597 (*Foeniculum vulgare* L.) genotypes. *Industrial Crops and Products*, 2019, 142, 111852.  
598 doi: <https://doi.org/10.1016/j.indcrop.2019.111852>.
- 599 20. Yeken, M.Z.; Çiftçi, V.; Çancı, H.; Özer, G.; Kantar, F. Morphological characterization  
600 of common bean genotypes collected from the Western Anatolia Region of Turkey.  
601 *International Journal of Agriculture and Wildlife Science*, 2019, 5(1), 124-139. doi:

- 602 10.24180/ijaws.529713.
- 603 21. Srivastava, R.K.; Kumar, S.; Sharma, R.S. *Ocimum* as a Promising Commercial Crop.  
604 The *Ocimum* Genome. Compendium of Plant Genomes. ISSN 2199-4781 ISSN 2199-  
605 479X (electronic) Compendium of Plant Genomes ISBN 978-3-319-97429-3 ISBN 978-  
606 3-319-97430-9 (eBook), 2018. doi:<https://doi.org/10.1007/978-3-319-97430-9>
- 607 22. Bahl, J.R.; Singh, A.K.; Lal, R.K.; Gupta, A.K. High-yielding improved varieties of  
608 medicinal and aromatic crops for enhanced income. In: Singh B, Peter KV (eds) *New*  
609 *age herbals*. Springer Nature Singapore Pte Ltd, 2018, pp 257-259.
- 610 23. Darrah, H.H. *The cultivated basil*. Thomas, T.E., Independence, Missouri, 1980.
- 611 24. Egata, D.F.; Geja, W.; Mengesha, B. Agronomic and bio-chemical variability of  
612 Ethiopian Sweet basil (*Ocimum basilicum* L.) accessions. *Acad. Res. J. Agri. Sci. Res.*,  
613 2017, 5(7), 489-508.
- 614 25. Singh, A.P.; Dwivedi, S.; Bharti, S.; Srivastava, A.; Singh, V.; Khanuja, S.P.S.  
615 Phylogenetic relationships as in *Ocimum* revealed by RAPD markers. *Euphytica*, 2004,  
616 136, 11-20.
- 617 26. Alemu, A.; Garedew, W.; Gebre, A. Essential oil yield and yield components of basil  
618 (*Ocimum basilicum* L.) as affected by genotype and intrarow spacing at Jimma, SW  
619 Ethiopia. *Acta Agrobot.*, 2018, 71(3), 1743.
- 620 27. Annamaria, P.; Bianca, P.; Daniela, G.; Simona, B.; Mirela, T.D. The Influence of some  
621 microelements on germination and chlorophyll quantity in *Ocimum basilicum* L. *Analele*  
622 *Universității din Oradea, Fascicula Protecția Mediului Vol. XXIII*, 2014, 873-880.
- 623 28. Erşahin, L. Quality and agronomic properties of sweet basil (*Ocimum basilicum* L.)  
624 grown in Diyarbakır ecological. Conditions. Department of Field Crops Institute of  
625 Natural and Applied Sciences University of Cukurova. *Sciences*, 2006, 9(5), 150-63.
- 626 29. Golcz, A.; Seidler Lozykowska, K.; Markiewicz, B. Effect of increasing nitrogen doses

- 627 and harvest terms on the growth and development of sweet basil (*Ocimum basilicum* L.).  
628 Part I. *Herba Polonica*, 2002, 48(2), 55-60.
- 629 30. Nassar, M.A.; El-Segai, M.U.; Mohamed, S.N.A. Botanical studies on *Ocimum*  
630 *basilicum* L. *Research Journal of Agriculture and Biological Sciences*, 2013, 9(5), 150-  
631 63.
- 632 31. Nurzyńska-Wierdak, R.; Dzida, K.; Rożek, E.; Jarosz, Z. Effects of nitrogen and  
633 potassium fertilization on growth, yield and chemical composition of garden rocket. *Acta*  
634 *scientiarum Polonorum Hortorum cultus*, 2012, 11 (2), 11.
- 635 32. Yaldiz, G. Çamlıca, M.; Eratalar, S.A.; Kulak, M. The effects of different kibebe fertilizer  
636 applications on yield of sweet basil (*Ocimum basilicum* L.). *Iğdır University Journal of*  
637 *the Institute of Science and Technology*, 2017, 7(1), 363-370.
- 638 33. Yaldiz, G.; Gul, F.; Kulak, M. Herb yield and chemical composition of basil (*Ocimum*  
639 *basilicum* L) essential oil in relation to the different harvest period and cultivation  
640 conditions. *African Journal of Traditional, Complementary and Alternative Medicines*,  
641 2015, 12(6), 71-76. doi:<http://dx.doi.org/10.4314/ajtcam.v12i6.7>.
- 642 34. Dzida, K. Biological value and essential oil content in sweet basil (*Ocimum basilicum*  
643 L.) depending on calcium fertilization and cultivar. *Acta Scientiarum Polonorum*  
644 *Hortorum Cultus*, 2010, 9, 153-61.
- 645 35. Yaldız, G.; Çamlıca, M.; Özen, F., Eratalar, S.A. Effect of poultry manure on yield and  
646 nutrient composition of sweet basil (*Ocimum basilicum* L.). *Communications in Soil*  
647 *Science and Plant Analysis*, 2019, 50(7), 838-852.  
648 doi:10.1080/00103624.2019.1589488.
- 649 36. Karaca, M.; Kara, Ş.M.; Özcan, M.M. Determination of herb yield and essential oil  
650 content of some basil (*Ocimum basilicum* L.) populations. *Ordu Univ. J. Sci. Tech.*, 2017,  
651 7(2), 160-169.

- 652 37. Anbuselvi, S.; Balamurugan; Kumar, S. Purification and characteristics of peroxidase  
653 from two varieties of tulsi and neem. *Res. J. Pharma. Biol. Chem. Sci.*, 2013, 4(1), 648-  
654 654.
- 655 38. Balyan, S.S.; Pushpangadan, P. A study on the taxonomic status and geographic  
656 distribution of the genus, *Ocimum*. *Perf Flav Assoc India*, 1988, 10(2), 13-19.
- 657 39. Bast, F.; Rani, P.; Meena, D. Chloroplast DNA phylogeography of holy basil (*Ocimum*  
658 *tenuiflorum*) in Indian subcontinent. *The Sci. World J.*, 2014, 1-6. doi:[http://](http://dx.doi.org/10.1155/2014/847482)  
659 [dx.doi.org/10.1155/2014/847482](http://dx.doi.org/10.1155/2014/847482).
- 660 40. Bernhardt, B.; Szabo, K.; Bernáth, J. Sources of variability in essential oil composition  
661 of *Ocimum americanum* and *Ocimum tenuiflorum*. *Acta Alimentaria*, 2015, 44(1), 111-118.
- 662 41. Bhamra, S.; Heinrich, M.; Howard, C.; Johnson, M.R.D.; Slater, A. DNA authentication  
663 of Tulsi; the cultural and medicinal value of *Ocimum* species among diasporic South  
664 Asian communities in the UK. *Planta Med.*, 2014, 80(16), P2B13.
- 665 42. Hewidy, M.; Sultan, E.; Elsayed, M.; Abdrabbo, M. Conventional basil production in  
666 different growing media of compost, vermicompost or peat-moss with loamy soil.  
667 *Journal of Horticultural Science and Ornamental Plants*, 2014, 6 (2), 82-89.
- 668 43. Omer, E.A.; Ovda, H.E.; Ahmed, S.S. Cultivation of sweet majoram (*Majoranum*  
669 *hortensis*) in newly reclaimed lands of Egypt. *J. Herbes Spices Med. Plants*, 1994, 2(2), 9-  
670 16.
- 671 44. Ekren, S.; Sönmez, C.; Özcakal, E.; Kurttas, Y.S.K.; Bayram, E.; Gürgülü, H. The effect  
672 of different irrigation water levels on yield and quality characteristics of purple basil  
673 (*Ocimum basilicum* L.). *Agric. Water Manag.*, 2012, 109, 155-161.
- 674 45. Bekhradi, F.; Luna, M.C.; Delshad, M.; Jordan, M.J.; Sotomayor, J.A.; Martínez-Conesa,  
675 C.; Gil, M.I. Effect of deficit irrigation on the postharvest quality of different genotypes  
676 of basil including purple and green Iranian cultivars and a Genovese variety. *Postharvest*

- 677 *Biol. Technol.*, 2015, 100, 127-135.
- 678 46. Dane, J.H.; Hopmans, J.W. Pressure plate extractor. In *Methods of Soil Analysis; Part*  
679 *4: Physical Methods*. SSSA Book Ser. 5; Dane, J.H., Topp, E.C., Eds.; SSSA: Madison,  
680 WI, USA, 2002; pp. 688-690.
- 681 47. Khalil, S.E.; Nahed, G.; Aziz, A.E.; Abou Leil, B.H. Effect of water stress and ascorbic  
682 acid on some morphological and biochemical composition of *Ocimum basilicum* plant.  
683 *J. American Sci.*, 2010, 6, 33-44.
- 684 48. Chang, X.; Alderson, P.G.; Wright, C.J. Effect of temperature integration on the growth  
685 and volatile oil content of basil (*Ocimum basilicum* L.). *Journal of Horticultural Science*  
686 *and Biotechnology*, 2005, 80(5), 593-598.
- 687 49. Kalamartzis, L.; Dordas, C.; Georgiou, P.E.; Menexes, G. The Use of appropriate  
688 cultivar of basil (*Ocimum basilicum*) can increase water use efficiency under water stress.  
689 *Agronomy*, 10, 70; doi:10.3390/agronomy10010070.
- 690 50. Köse, İ.; Kara Ş.M.; Özcan, M.M. The effect of plant density on herb yield and essential  
691 oil content of basil (*Ocimum basilicum* L.). *Ordu University Journal of Science and*  
692 *Technology*, 2017, 7(2), 253-265.
- 693 51. Arslan, M.; Üremiş, İ.; Sarıhan, E.; Mert, A. (2009). Herba yield, essential oil rate and  
694 components of basil varieties (*Ocimum basilicum* L.) grown in Eastern Mediterranean  
695 conditions. 8. Field Crop Congress, 19-22 October 2009, Volume II, 300-302, Hatay,  
696 Turkey.
- 697 52. Sullivan C. Herbs in College Seminar 235-Food For Thought: The Science, Culture, and  
698 Politics of Food in Spring, 2009 Available from:  
699 [http://academics.hamilton.edu/foodforthought/our\\_research\\_files/herbs.pdf](http://academics.hamilton.edu/foodforthought/our_research_files/herbs.pdf).
- 700 53. Atghaei, M.; Rajabi, A.; Hedayaty, S. Investigating the effect of bush density on the  
701 yield and leaf essence of green basil landraces (*Ocimum basilicum*). *International*

- 702 *Journal of Research Studies in Agricultural Sciences*, 2015, 1, 11-17.
- 703 54. Beatović, D.; Krstić-Milošević, D.; Trifunović, S.; Šiljegović, J.; Glamočlija, J.; Ristić,  
704 M.; Jelačić, S. Chemical composition, antioxidant and antimicrobial activities of the  
705 essential oils of twelve *Ocimum basilicum* L. cultivars grown in Serbia. *Rec. Nat. Prod.*,  
706 2015, 9(1), 62-75.
- 707 55. Ozcan, M.; Chalchat, J.C. Essential oil composition of *Ocimum basilicum* L. and  
708 *Ocimum minimum* L. in Turkey. *Czech J. Food Sci.*, 2002, 20, 223-228.
- 709 56. Juliani, H.R.; Simon, J.E. Antioxidant activity of basil. In Trends in new crops and new  
710 uses, Janick, J., Whipkey, A., Eds.; ASHS Press: Alexandria, VA, 2002, pp 575-579.
- 711 57. Akgul, A. Volatile oil composition of sweet basil (*Ocimum basilicum* L.) cultivating in  
712 Turkey. *Food/Nahrung*, 1989, 33, 87-88.
- 713 58. Khatri, L.M.; Nasir, M.K.A.; Saleem, R.; Noor, F. Evaluation of Pakistani sweet basil  
714 oil for commercial exploitation. *Pakistan J. Sci. Ind. Res.*, 1995, 38, 281-282.
- 715 59. Pino, J.A.; Roncal, E.; Rosado, A.; Goire, I. The essential oil of *Ocimum basilicum* L.  
716 from Cuba. *J. Essent. Oil Res.*, 1994, 6, 89-90.
- 717 60. Ceylan, A. Medicinal plant II. Ege University Agriculture Faculty, Publish No: 481,  
718 1997, Bornova, İzmir, Turkey.
- 719 61. Daneshian, A.; Gurbuz, B.; Cosge B.; Ipek, A. Chemical components of essential oils  
720 from basil (*Ocimum basilicum* L.) grown at different nitrogen levels. *International*  
721 *Journal of Natural and Engineering Sciences*, 2009, 3(3), 9-13.
- 722 62. Arabaci, O.; Bayram, E. The effect of nitrogen fertilization and different plant densities  
723 on some agronomic and technologic characteristic of *Ocimum basilicum* L. (Basil).  
724 *Journal of Agronomy*, 2004, 3, 255-262.
- 725 63. Refika Akçali Giachino, R.; Sonmez, Ç.; Tonk, F.A.; Bayram, E.; Yüce, S.; Telci, I.;  
726 Furan, M.A. RAPD and essential oil characterization of Turkish basil (*Ocimum*



- 727           *basilicum* L.). *Plant Syst. Evol.*, 2014, 300, 1779-1791.
- 728   64.   Gürbüz, B.; Ipek, A.; Basalma, D.; Sarihan, E.O.; Sancak, C.; Ozcan, S. Effects of  
729           diurnal variability on essential oil composition of sweet basil (*Ocimum basilicum* L.).  
730           *Asian J. Chem.*, 2006, 18(1), 285-288.
- 731   65.   Runyoro, D.; Nagassapa, O.; Vagionas, K.; Aligiannis, N.; Graikou, K.; Chinou, I.  
732           Chemical composition and antimicrobial activity of the essential oils of four *Ocimum*  
733           species growing in Tanzania. *Food Chem.*, 2010, 119, 311-316.
- 734   66.   Zheljazkov, V.D. Assessment of wool-waste and hair-waste as soil amendment and  
735           nutrient source. *J. Environ. Qual.*, 2005, 34, 2310-2317.
- 736   67.   Leilah, A.A.; Al-Khateeb, S.A. Statistical analysis of wheat yield under drought  
737           conditions. *J. Arid Environ.*, 2005, 61, 483-96.
- 738   68.   Lewinshon, E.; Schalechet, F.; Wilkinson, J.; Matsui, K.; Tadmor, Y.; Nam, K.; Amar,  
739           O.; Lastochkin, E.; Larkov, O.; Ravid, U.; Iakovos Marotti, M. Piccaglia, R. Giovanelli,  
740           E. Differences in essential oil composition of basil (*Ocimum basilicum* L.) Italian  
741           cultivars related to morphological characteristics. *J. Agr. Food Chem.*, 1996, 44, 3926-  
742           3929.
- 743   69.   Golparvar, A.R.; Ghasemi-Pirbalouti, A.; Madani, H. Genetic control of some  
744           physiological attributes in wheat under drought stress conditions. *Pak. J. Bio. Sci.*, 2006,  
745           9, 1442-46.
- 746   70.   Veronesi, F.; Falcinelli, M. Evaluation of an Italian germplasm collection of *Festuca*  
747           arundinacea Schreb. through a multivariate analysis. *Euphytica*, 1988, 28, 211-220.

748
